# Supplementary material for: Response to Hypomethylating Agents in Myelodysplastic Syndrome Is Associated With Emergence of Novel TCR Clonotypes
Source: PubMed Central journal article supplement (PMC8072464; doi:10.3389/fimmu.2021.659625), 2021-04-12

A.

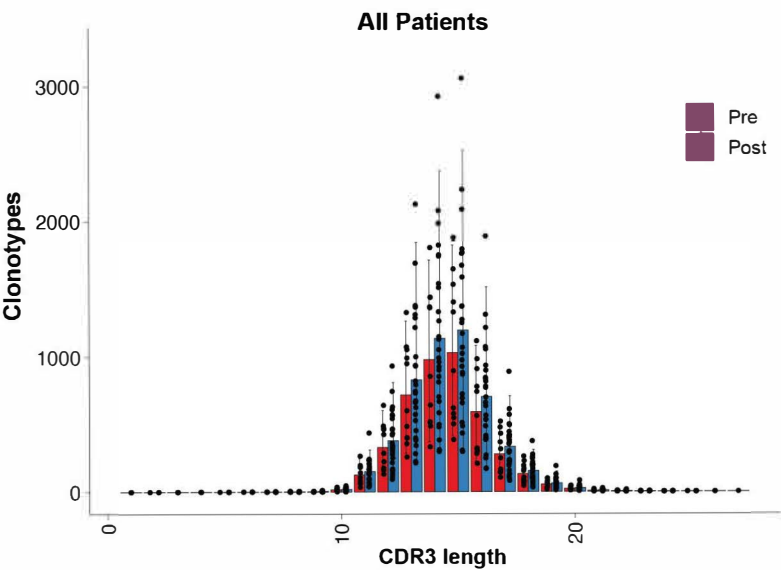

B.

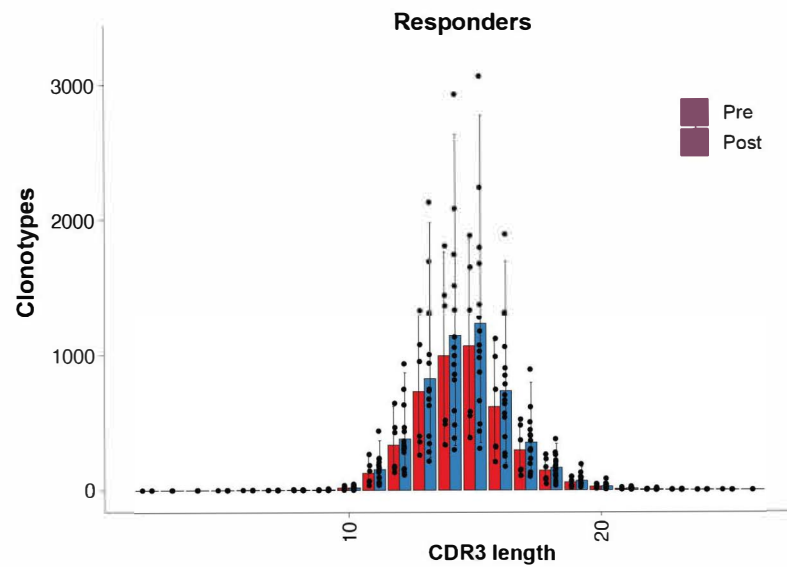

C.

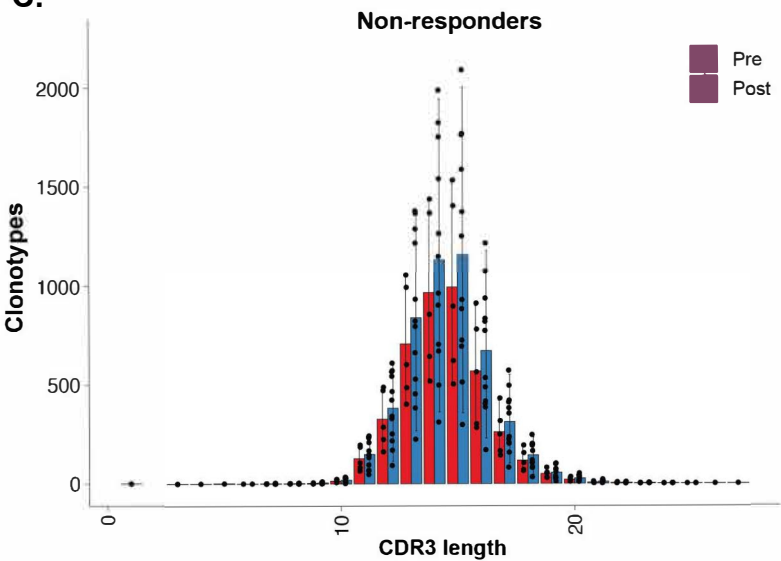

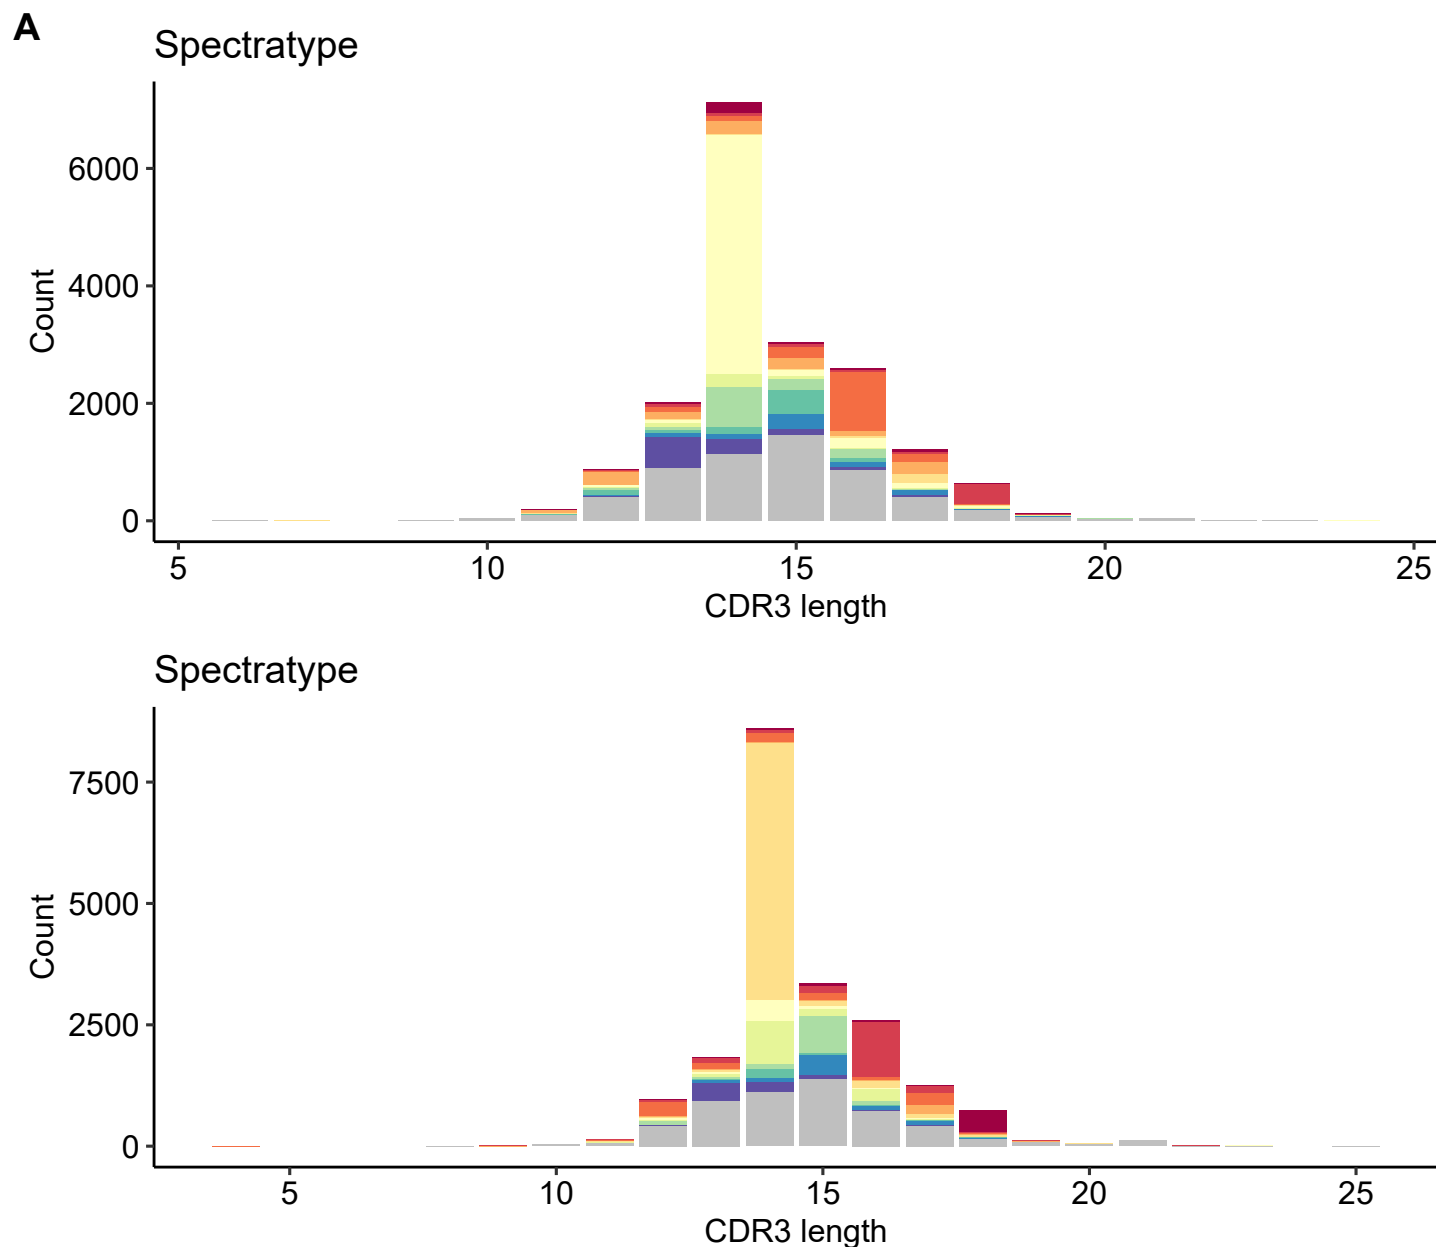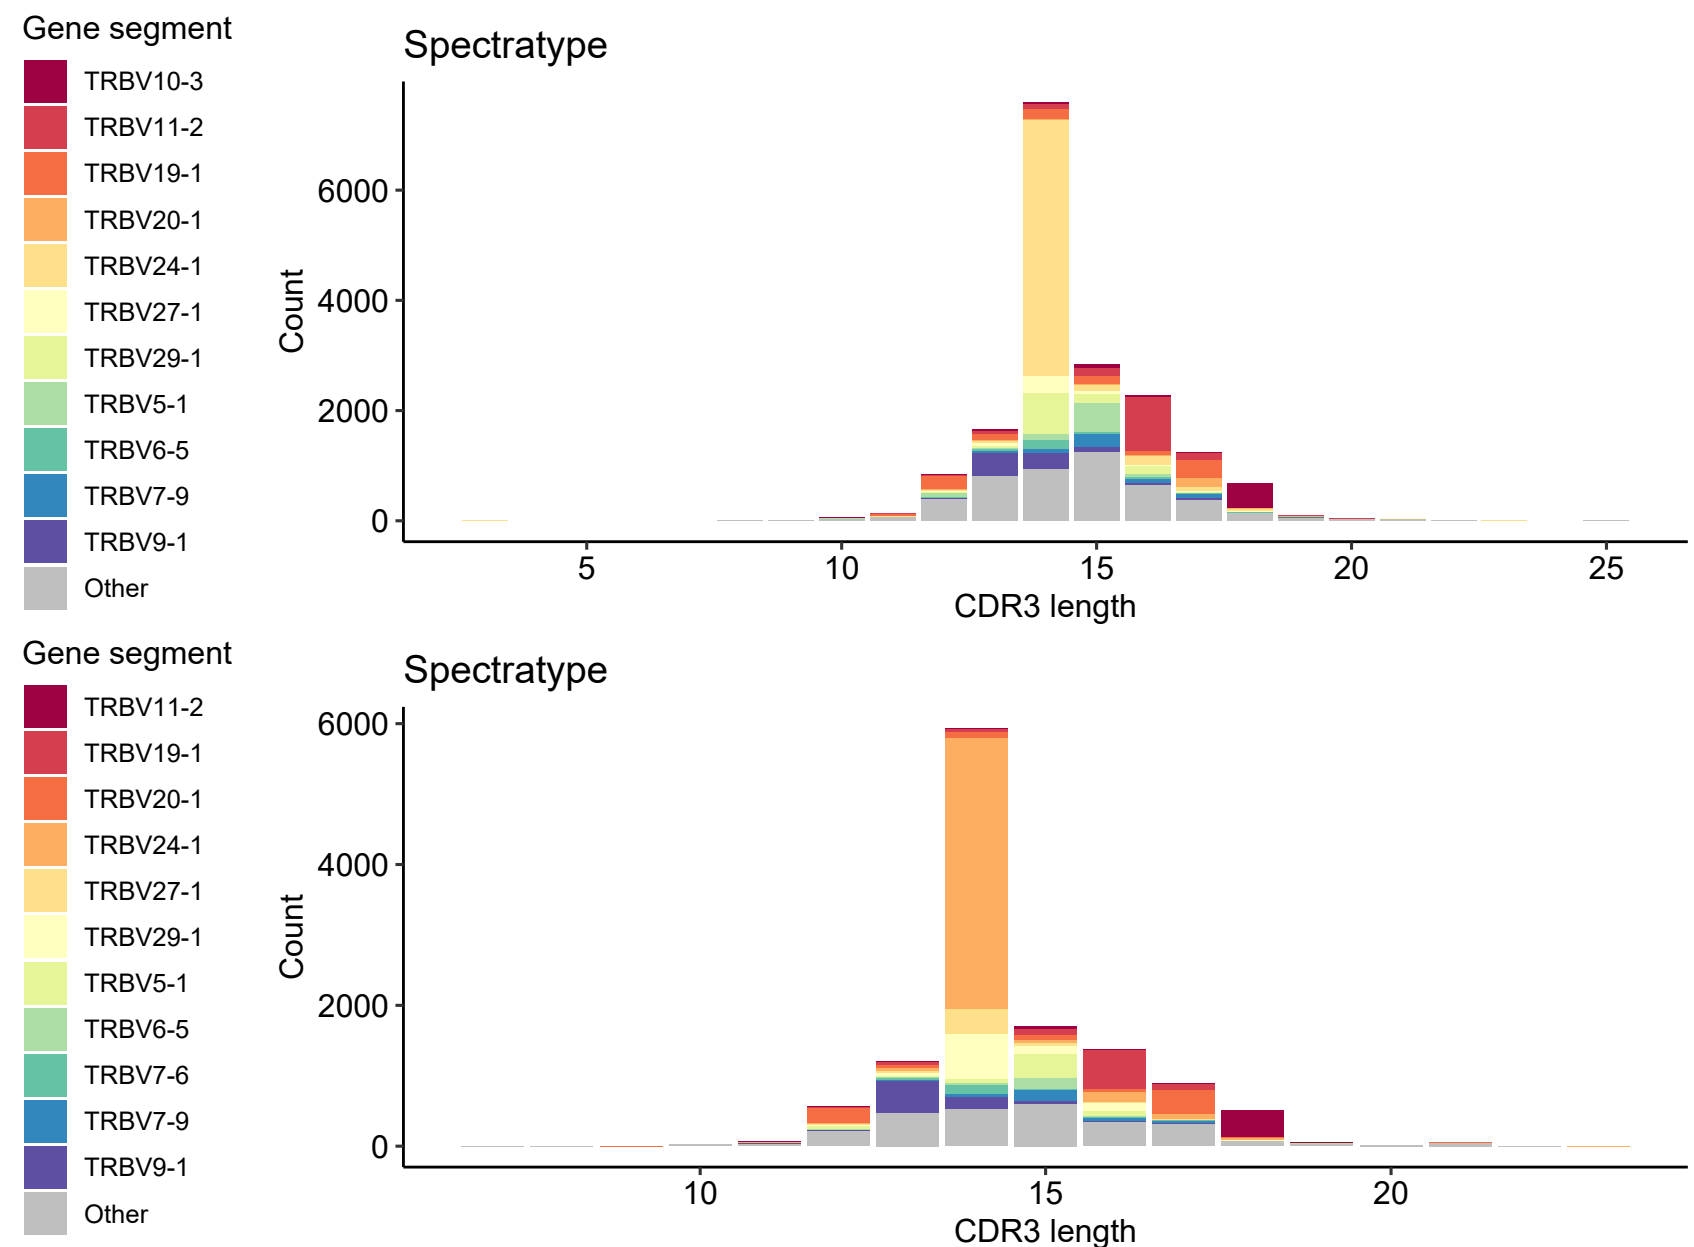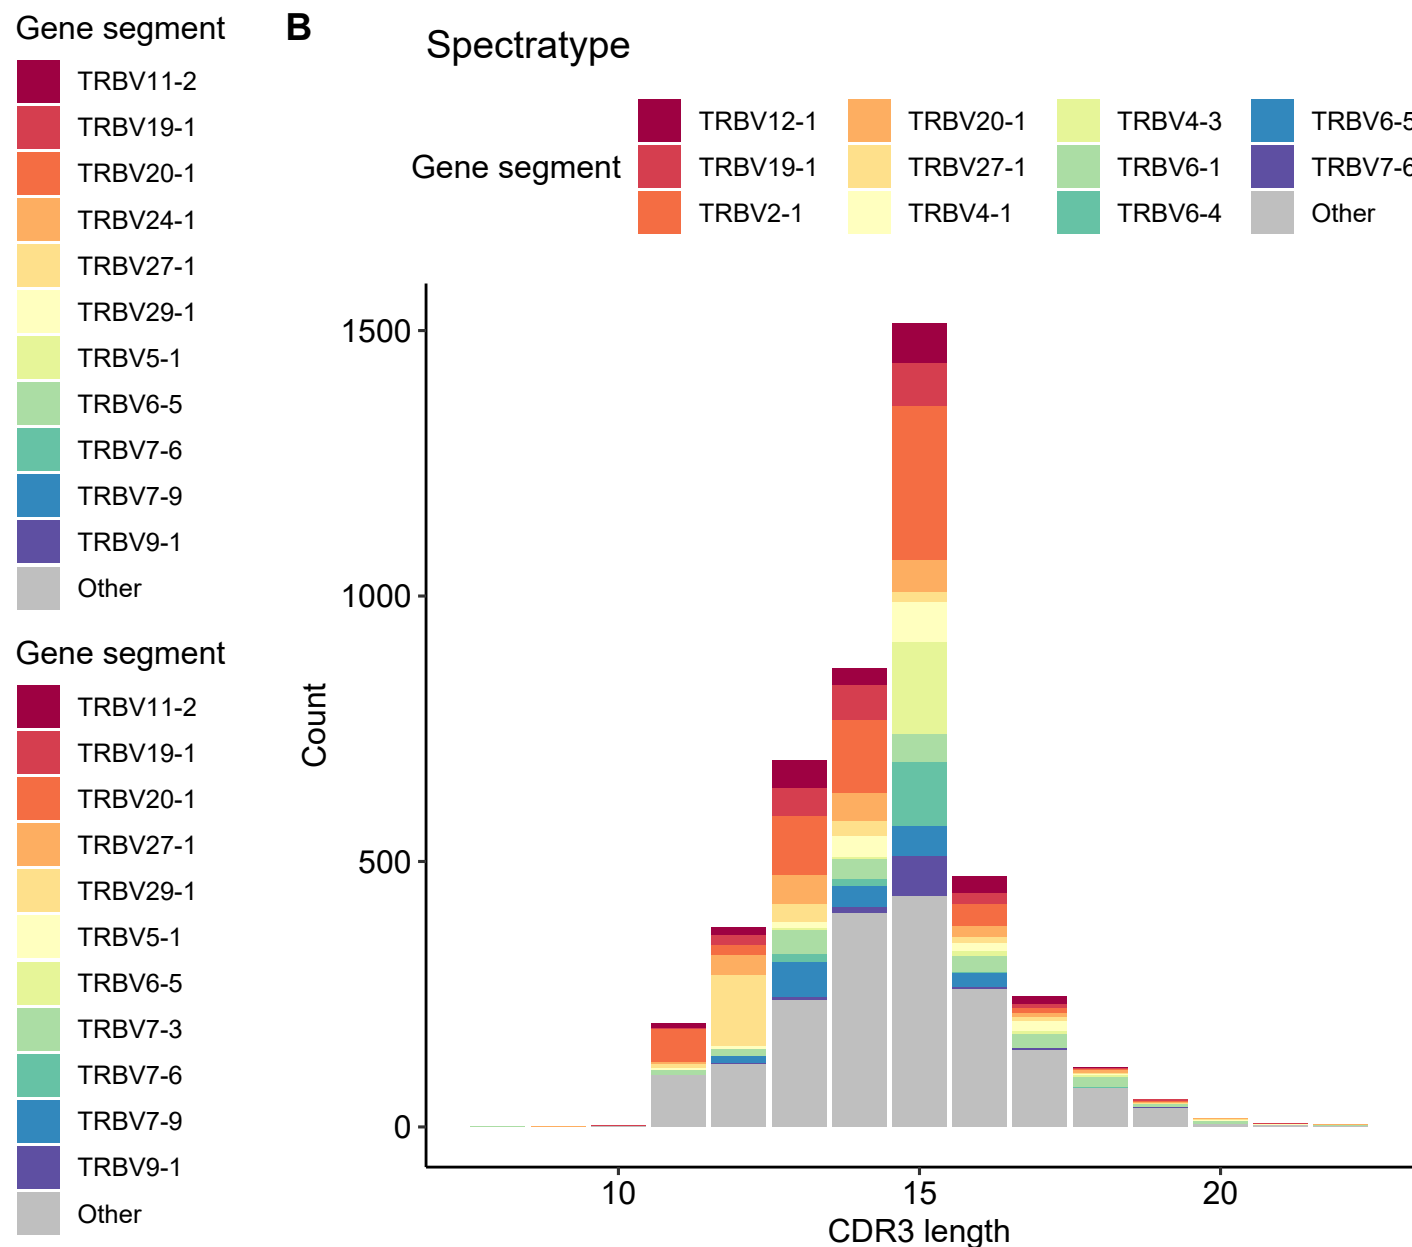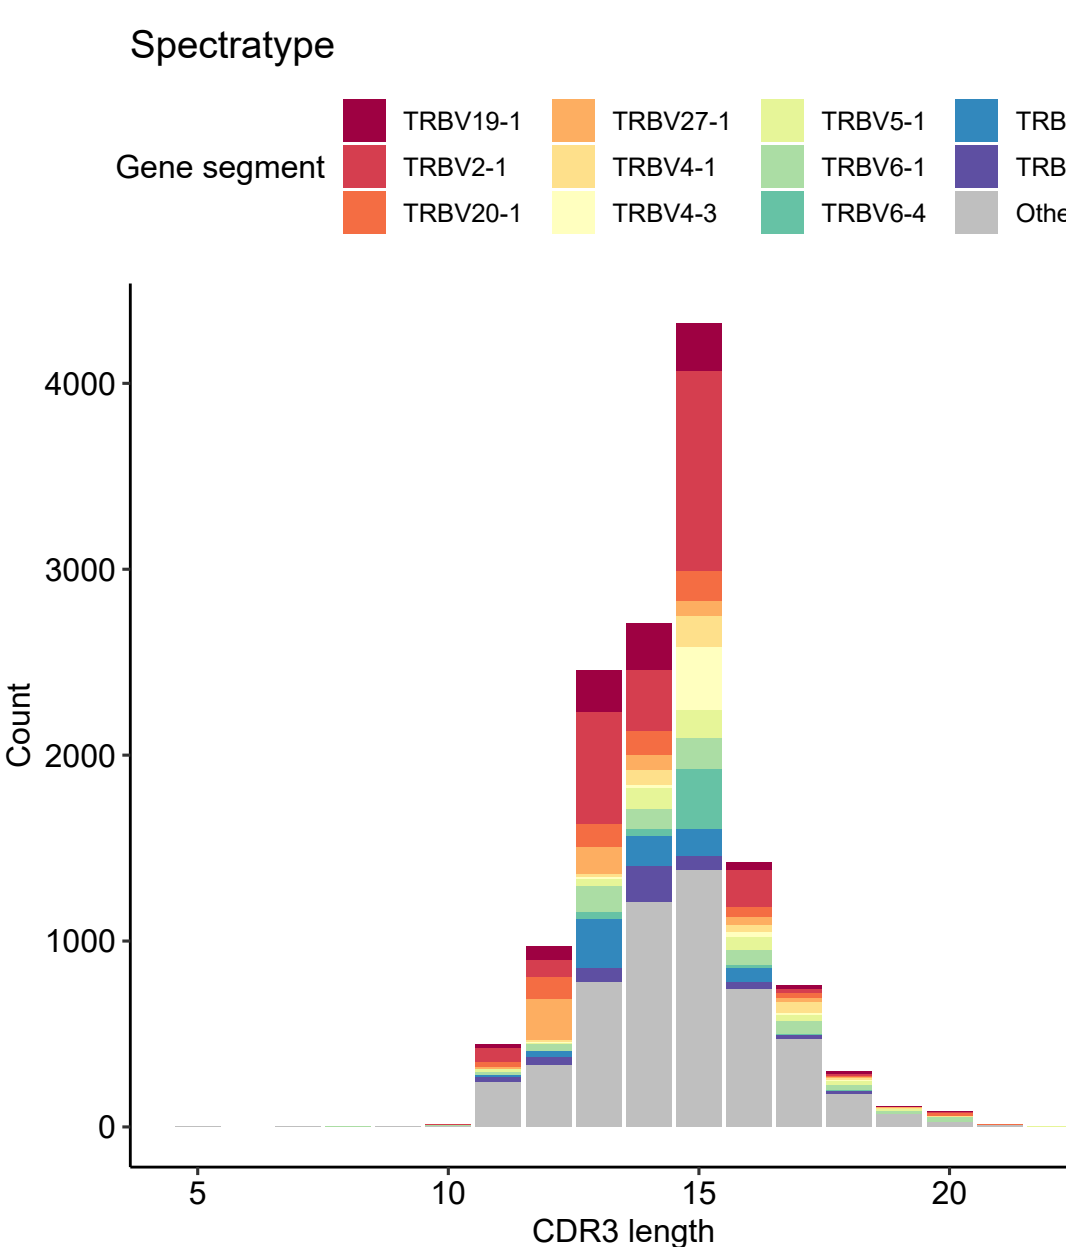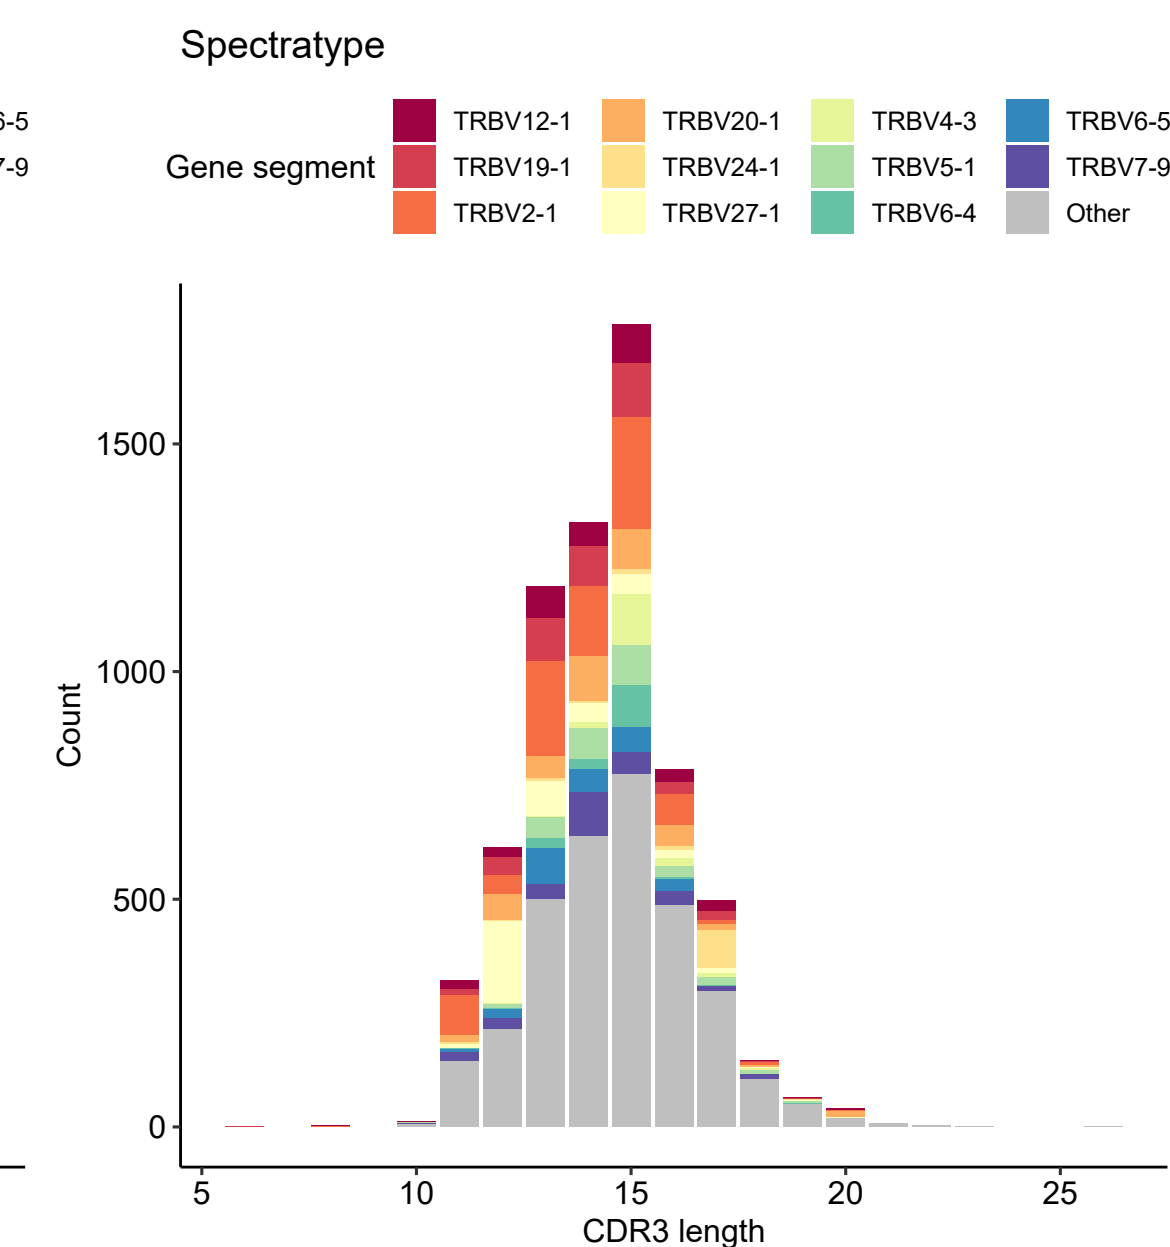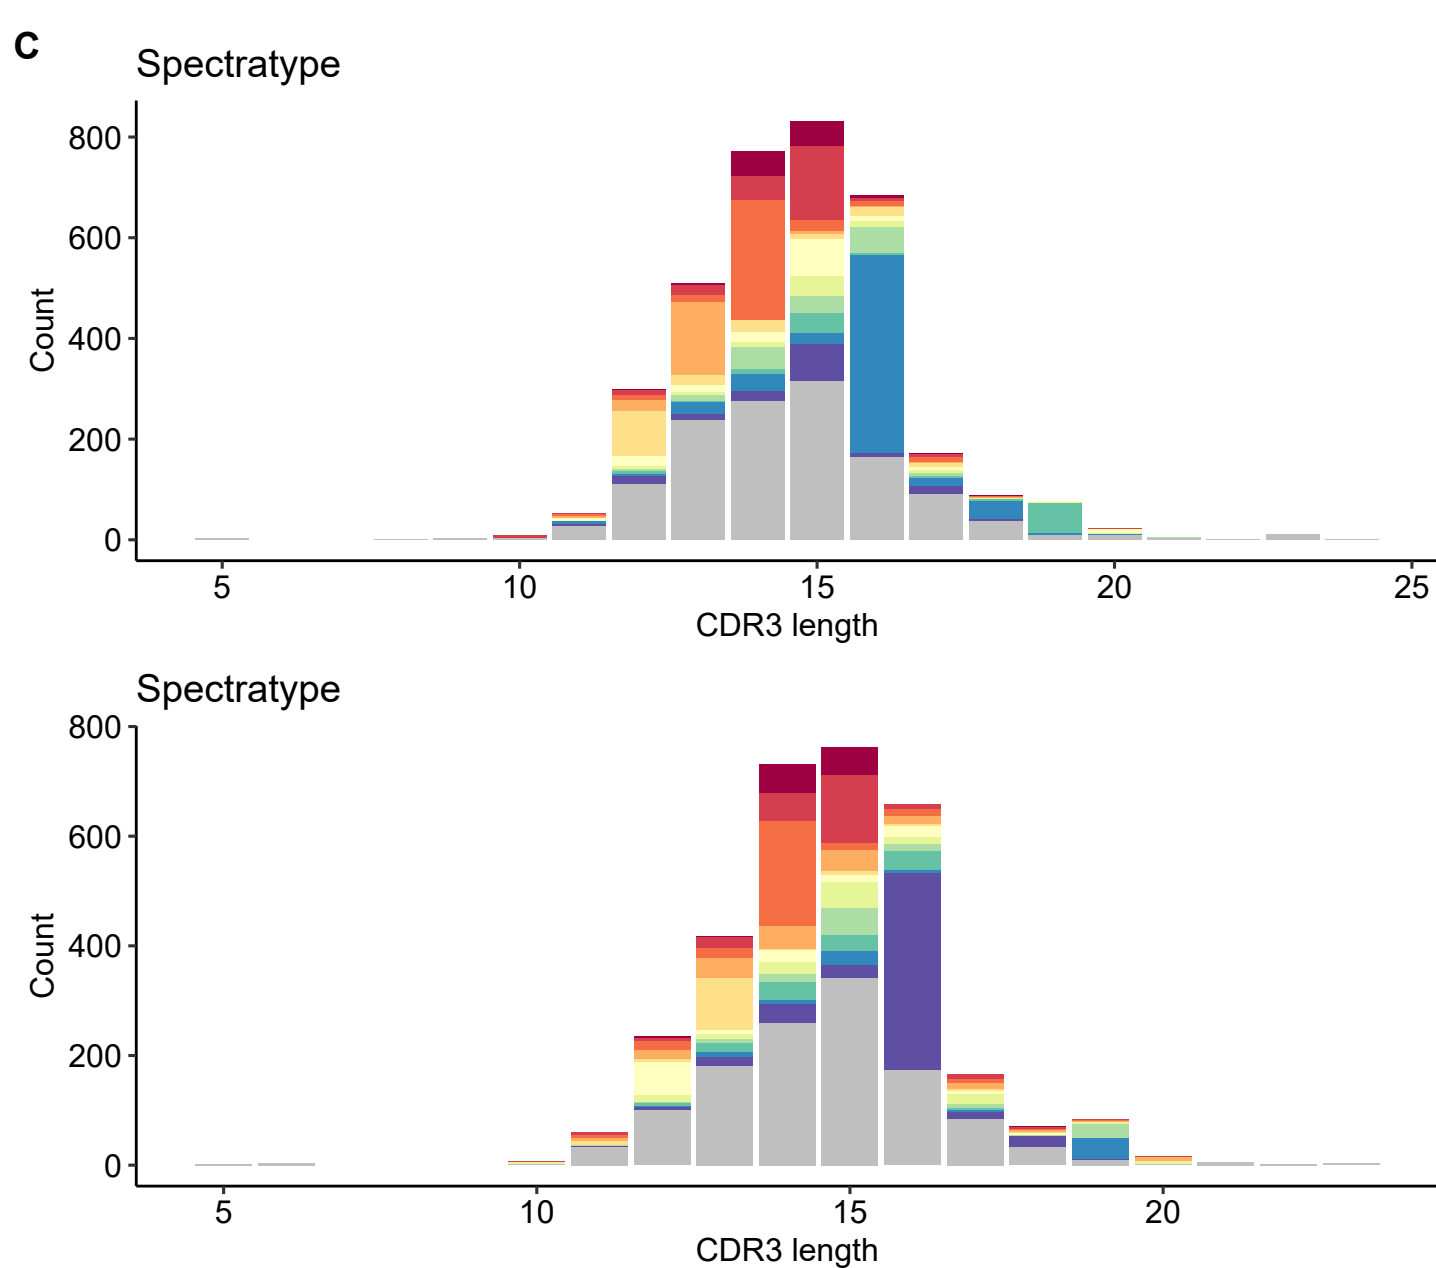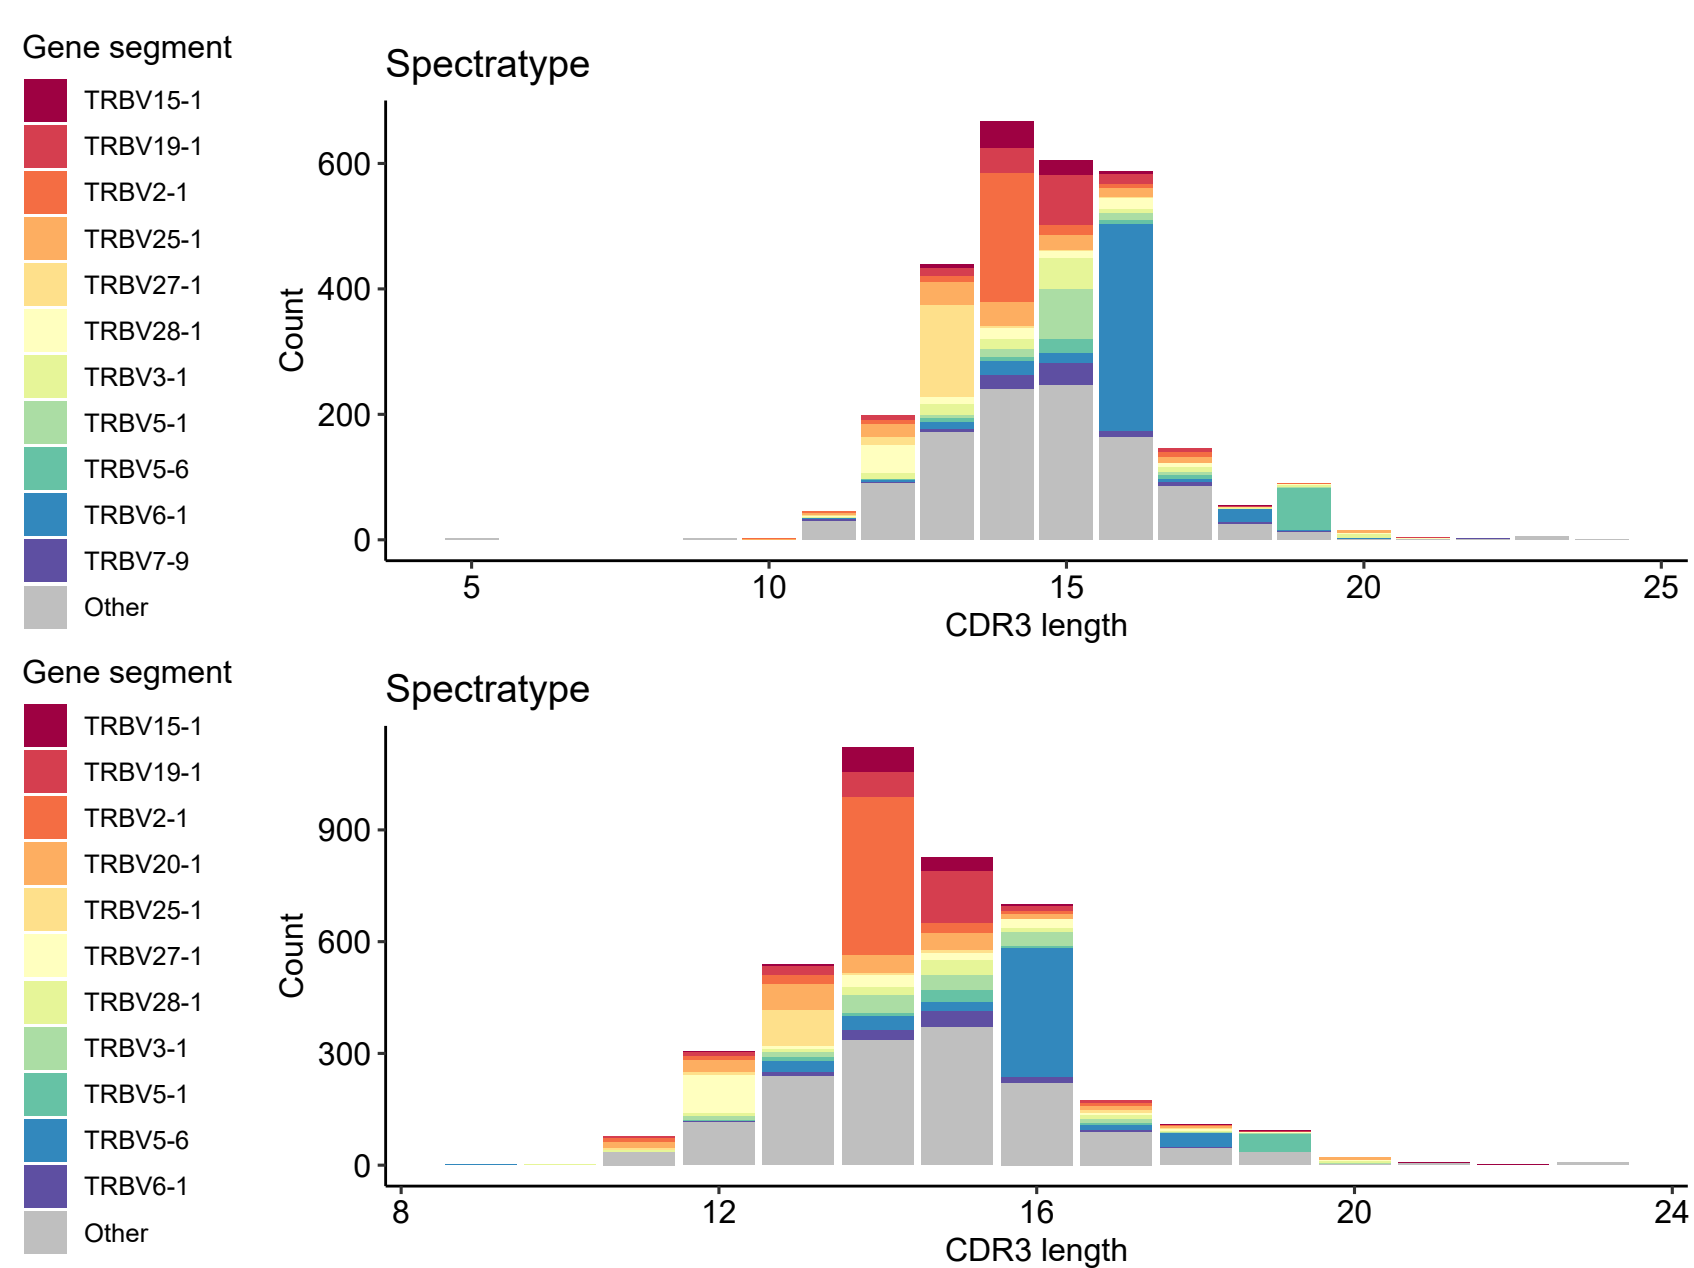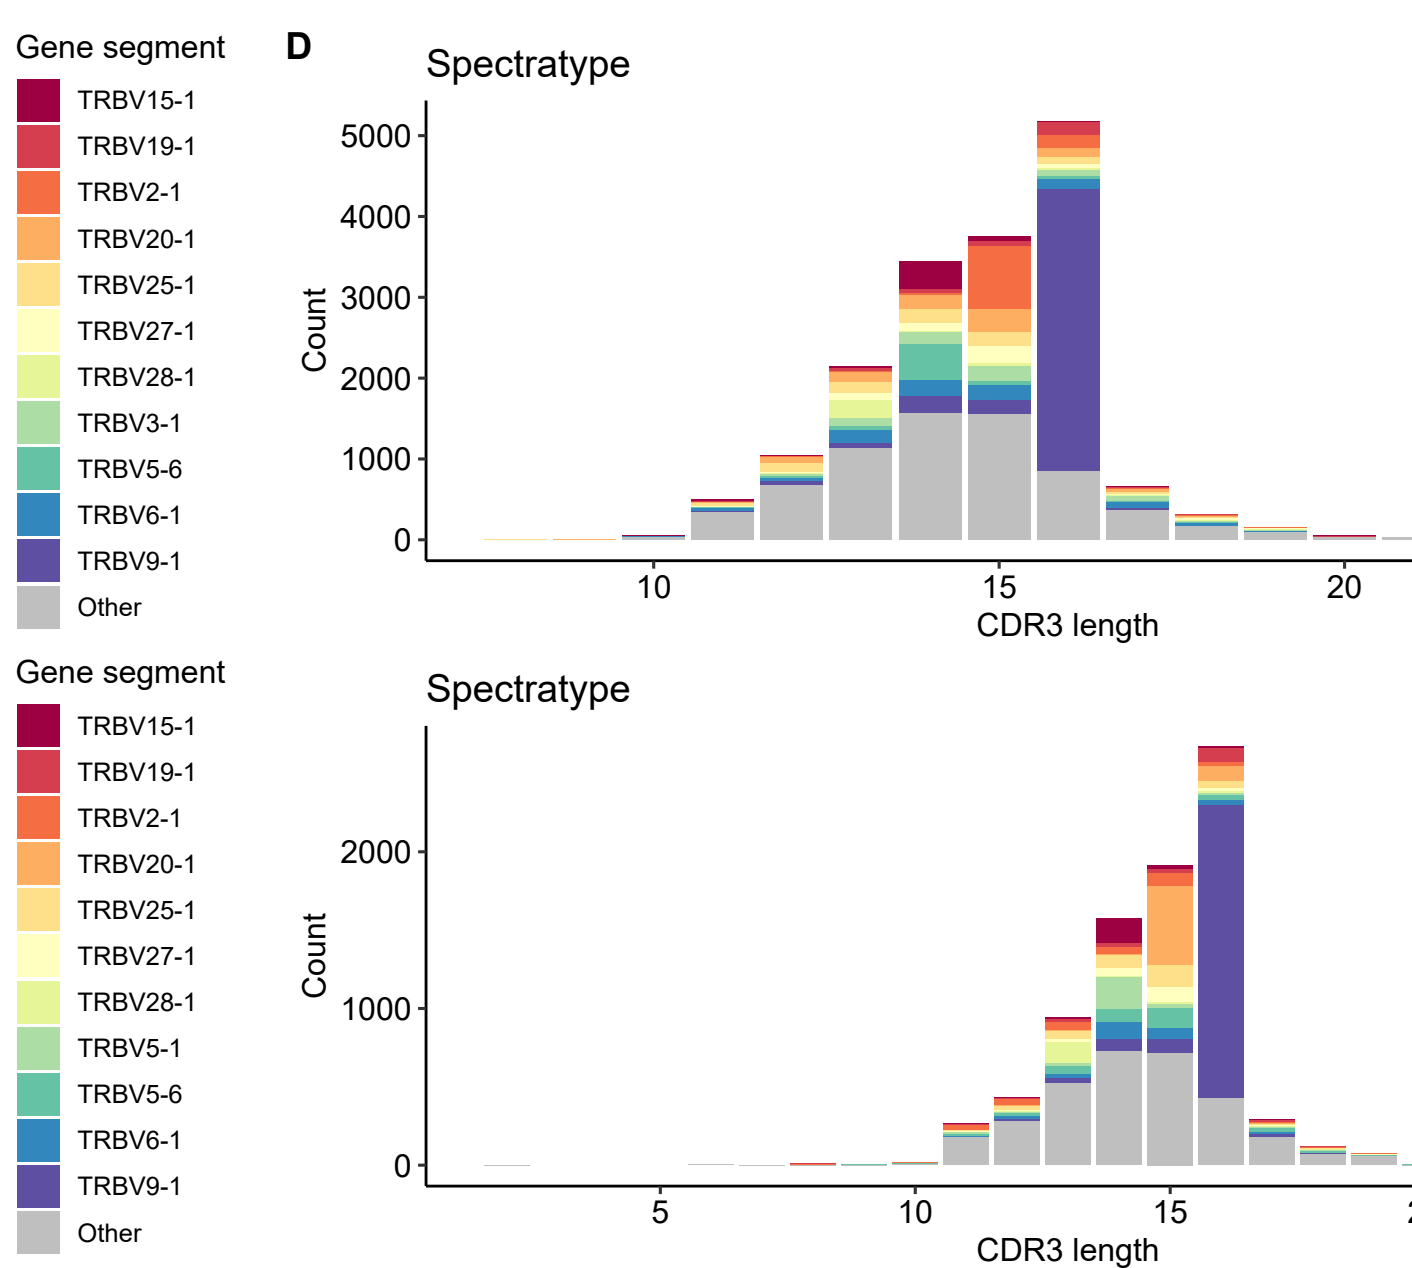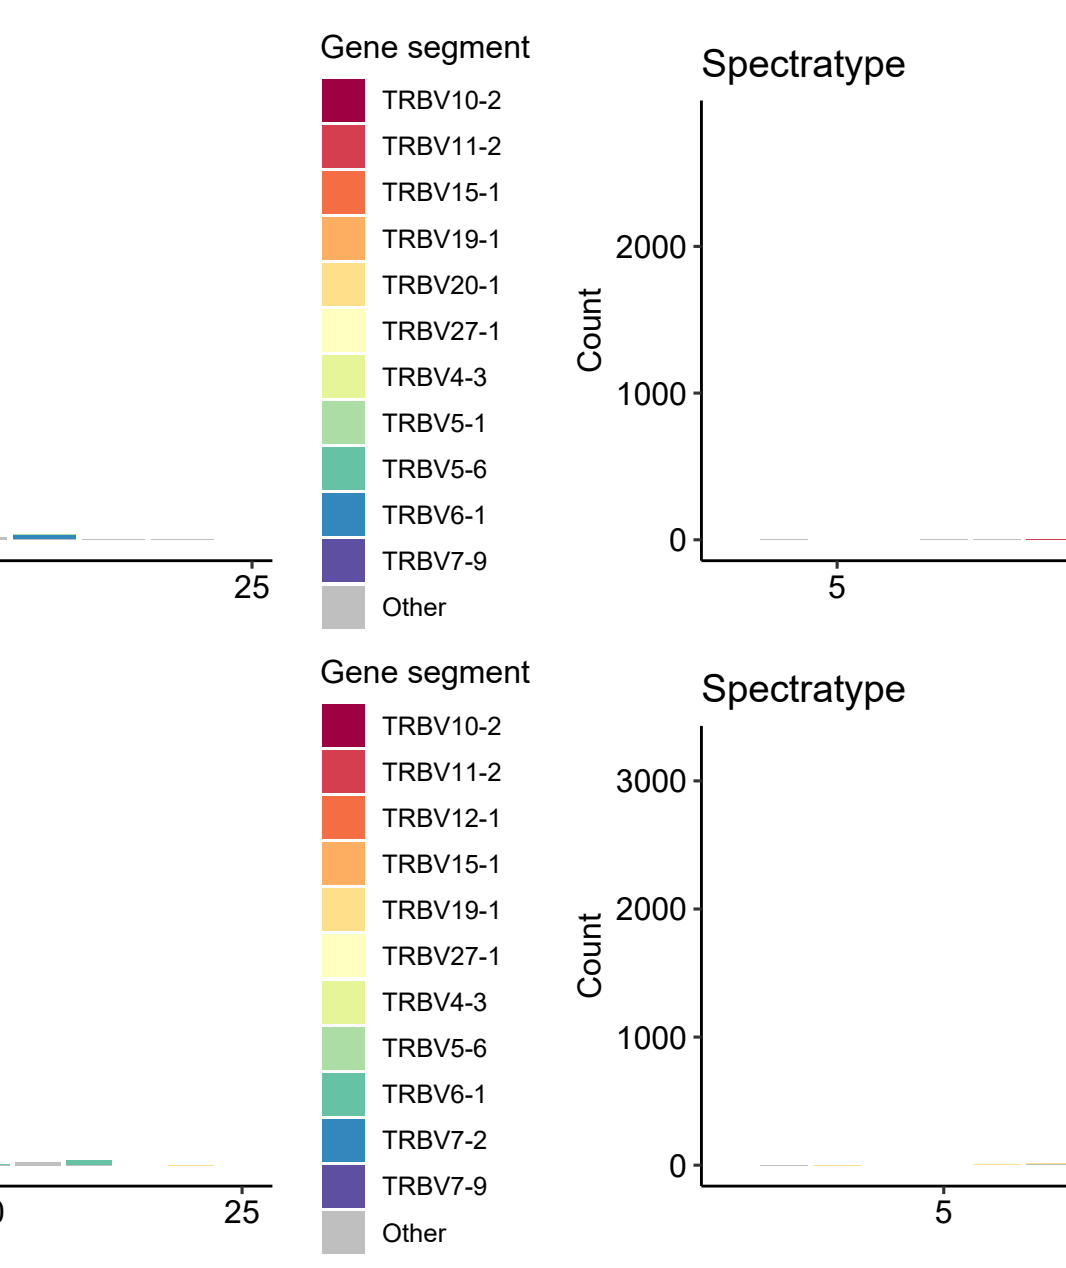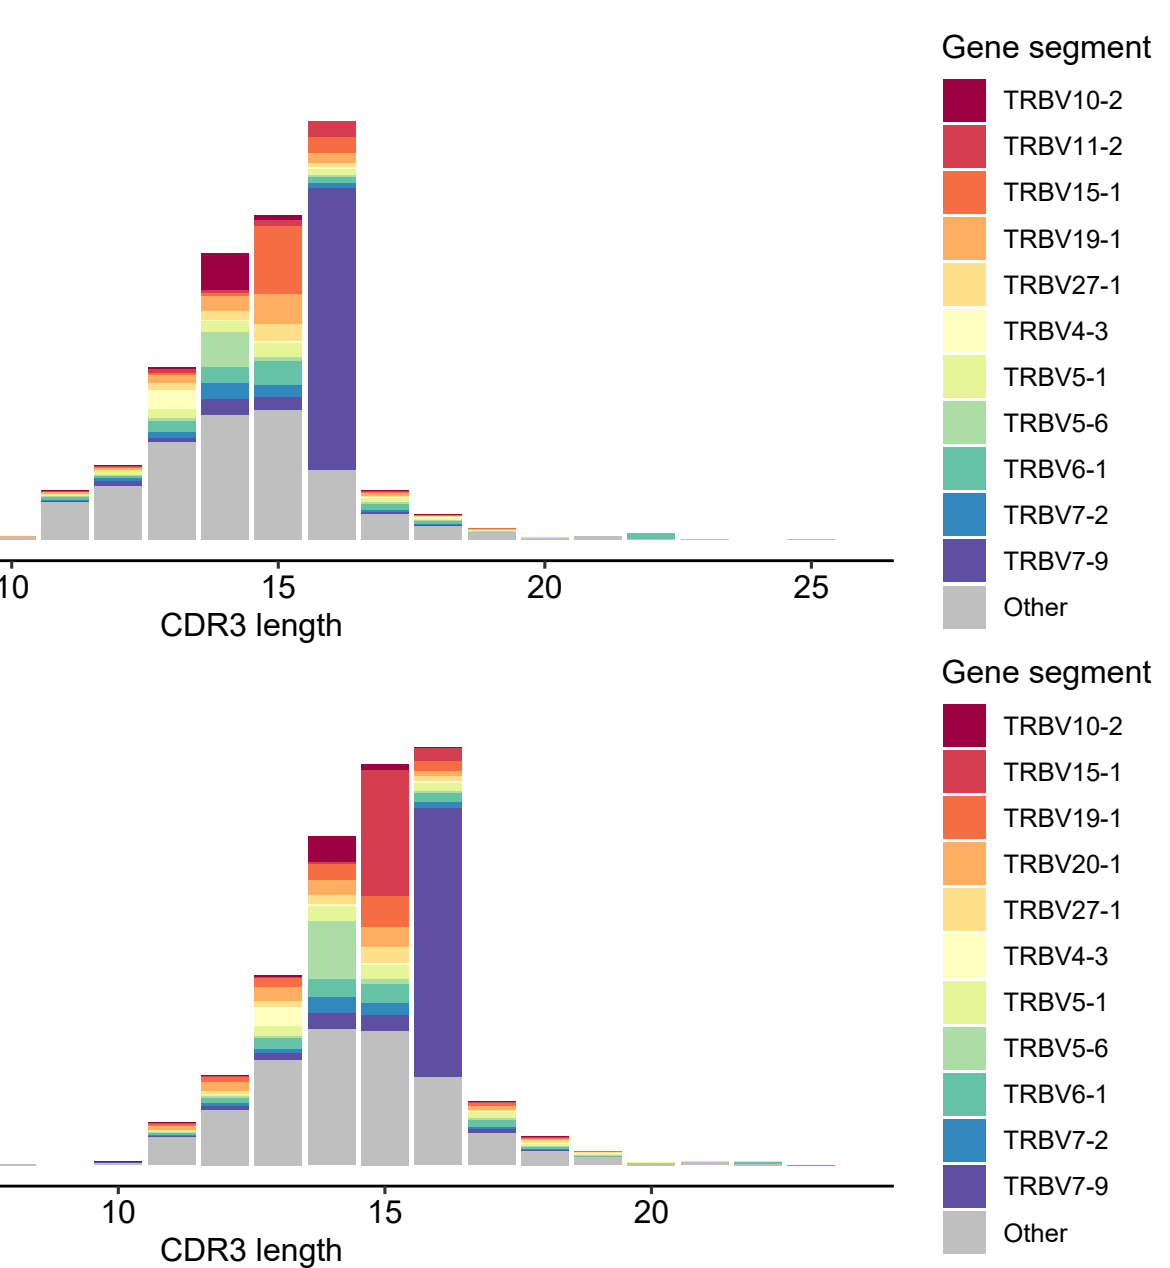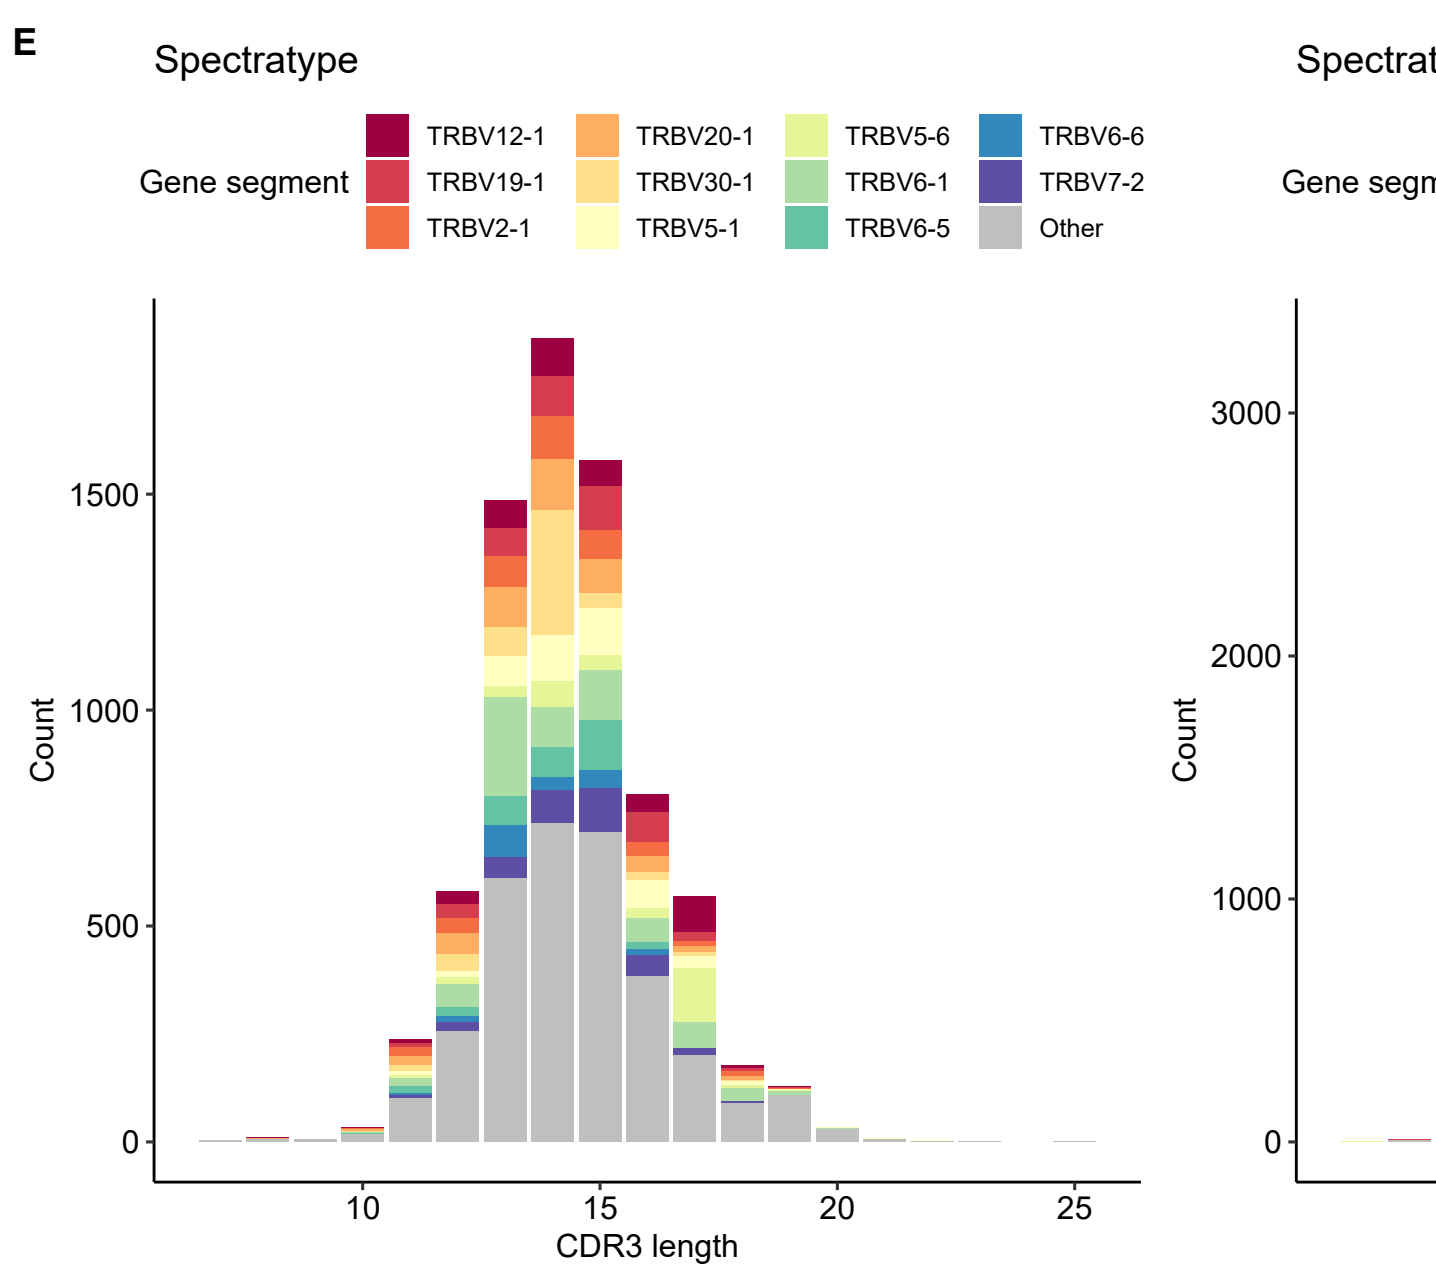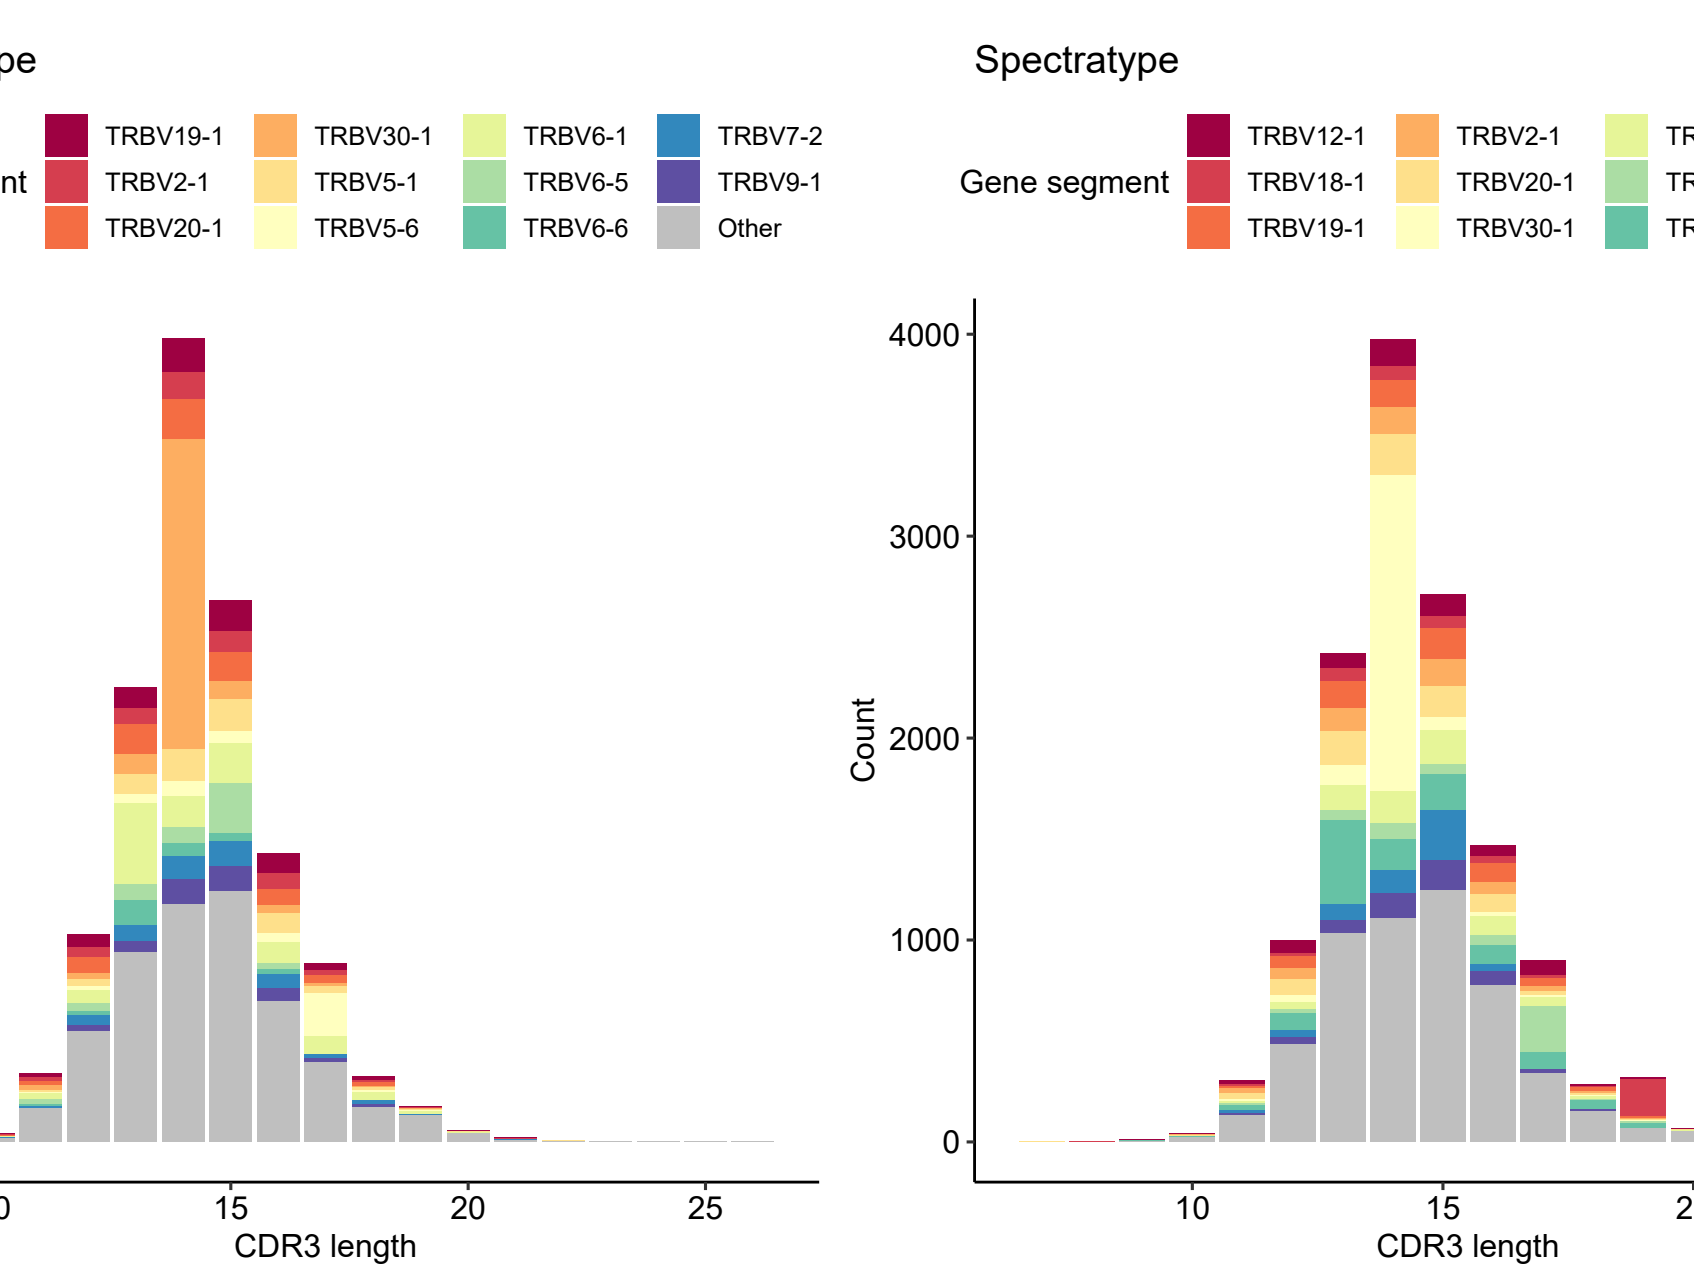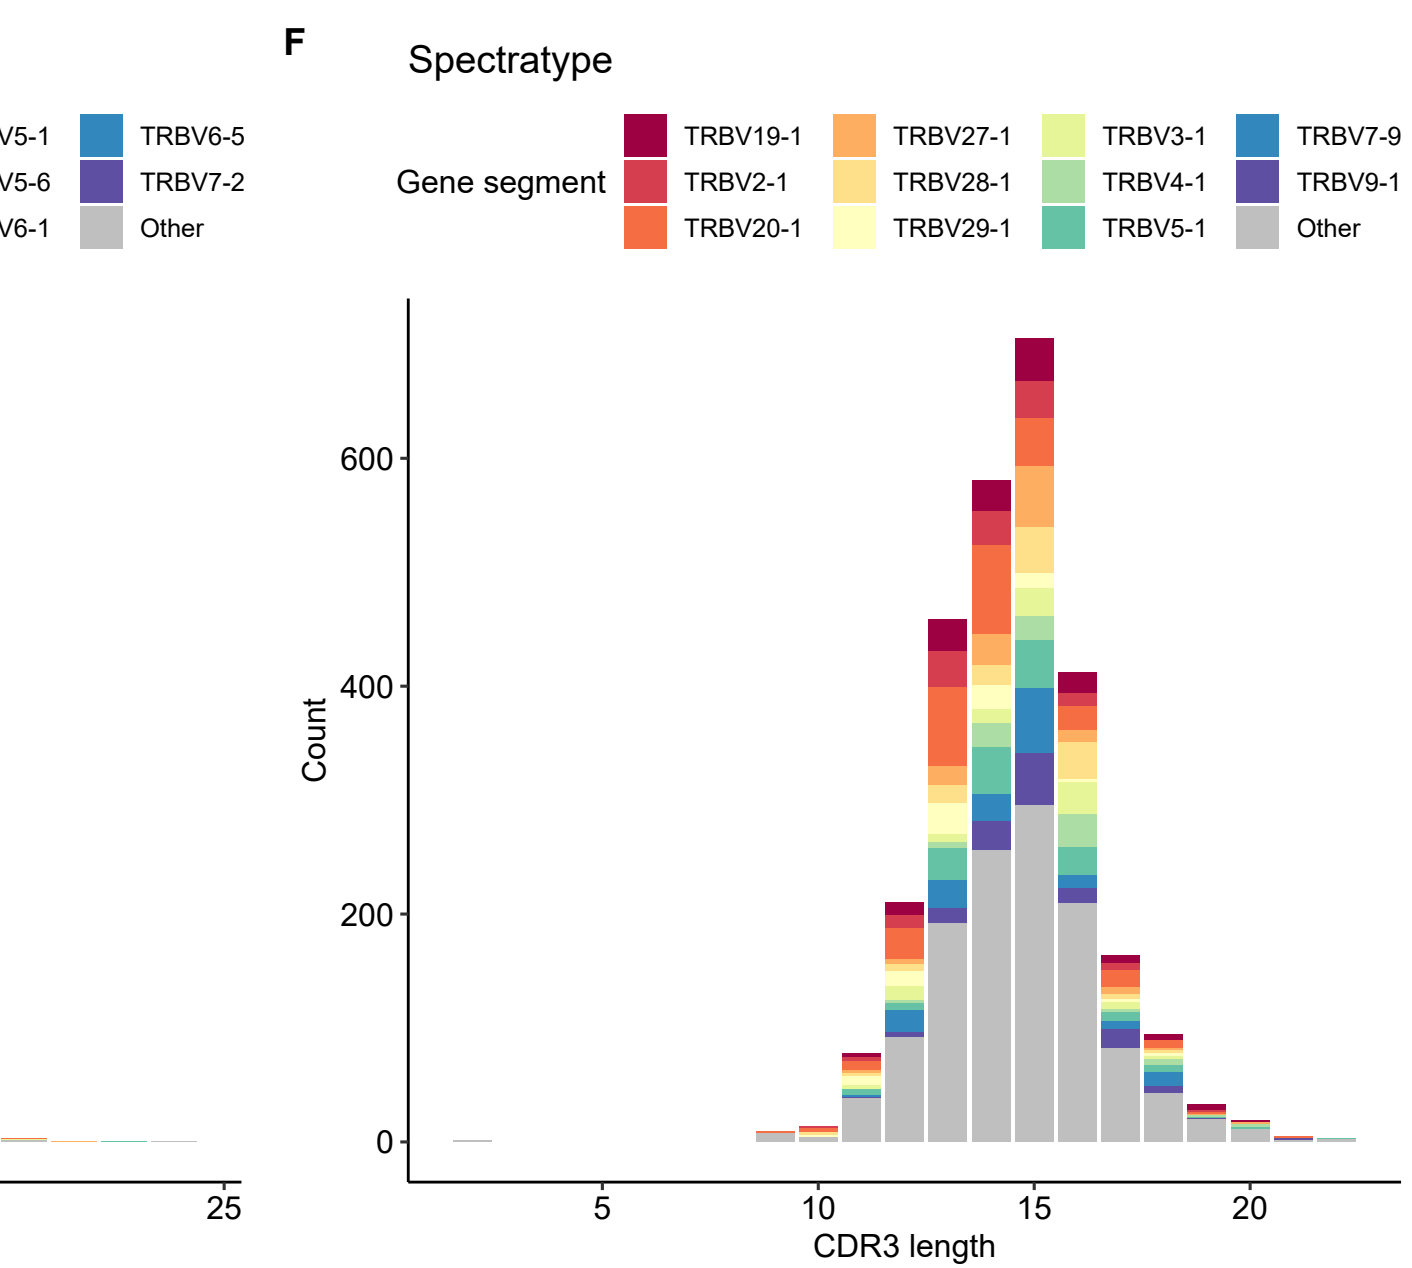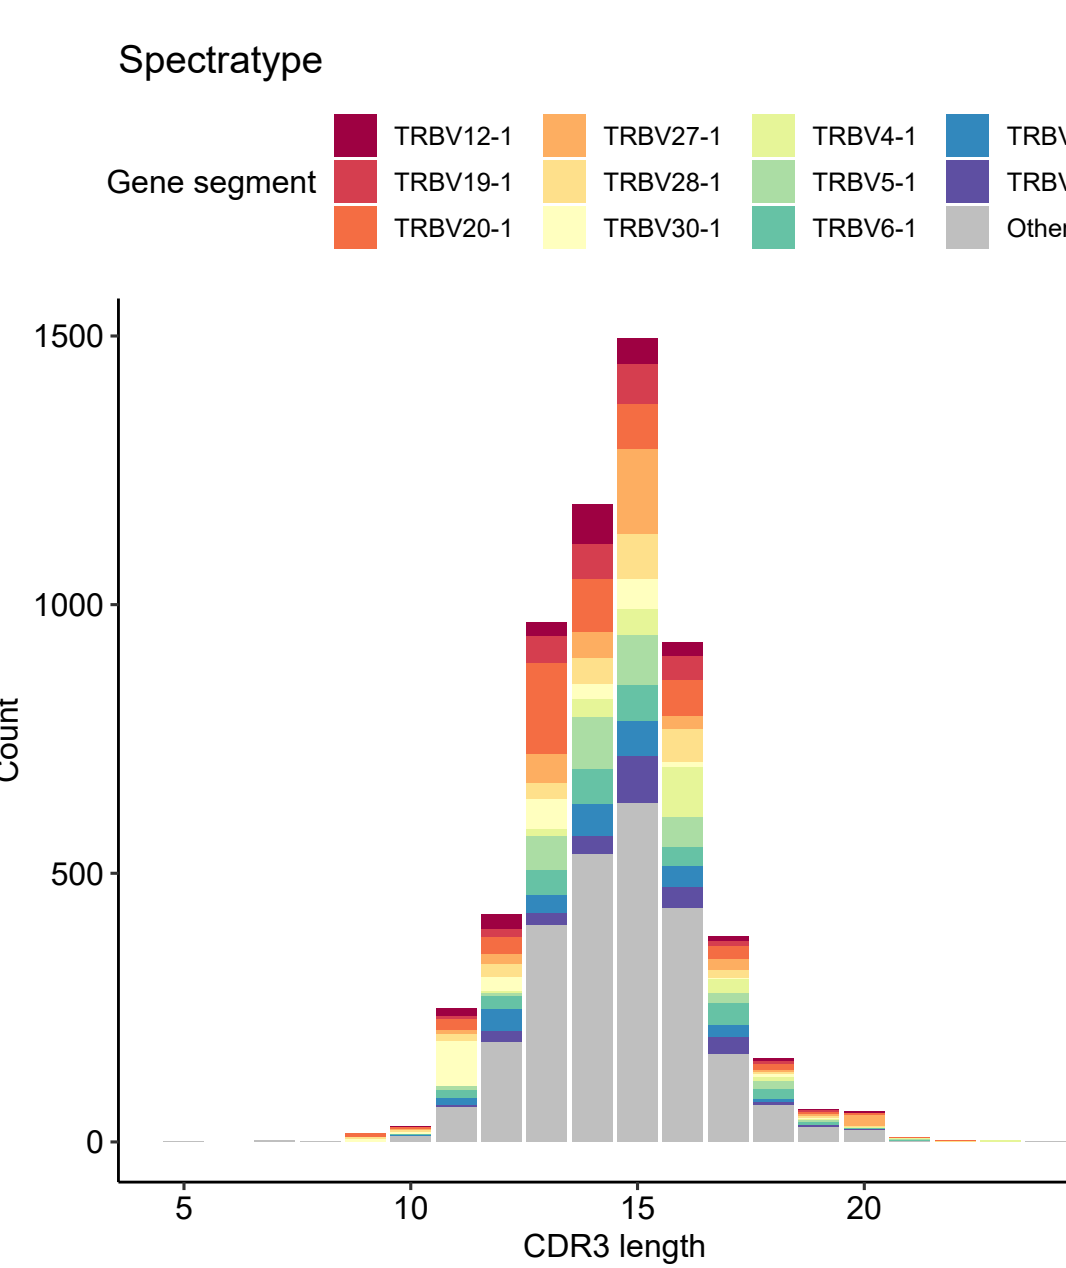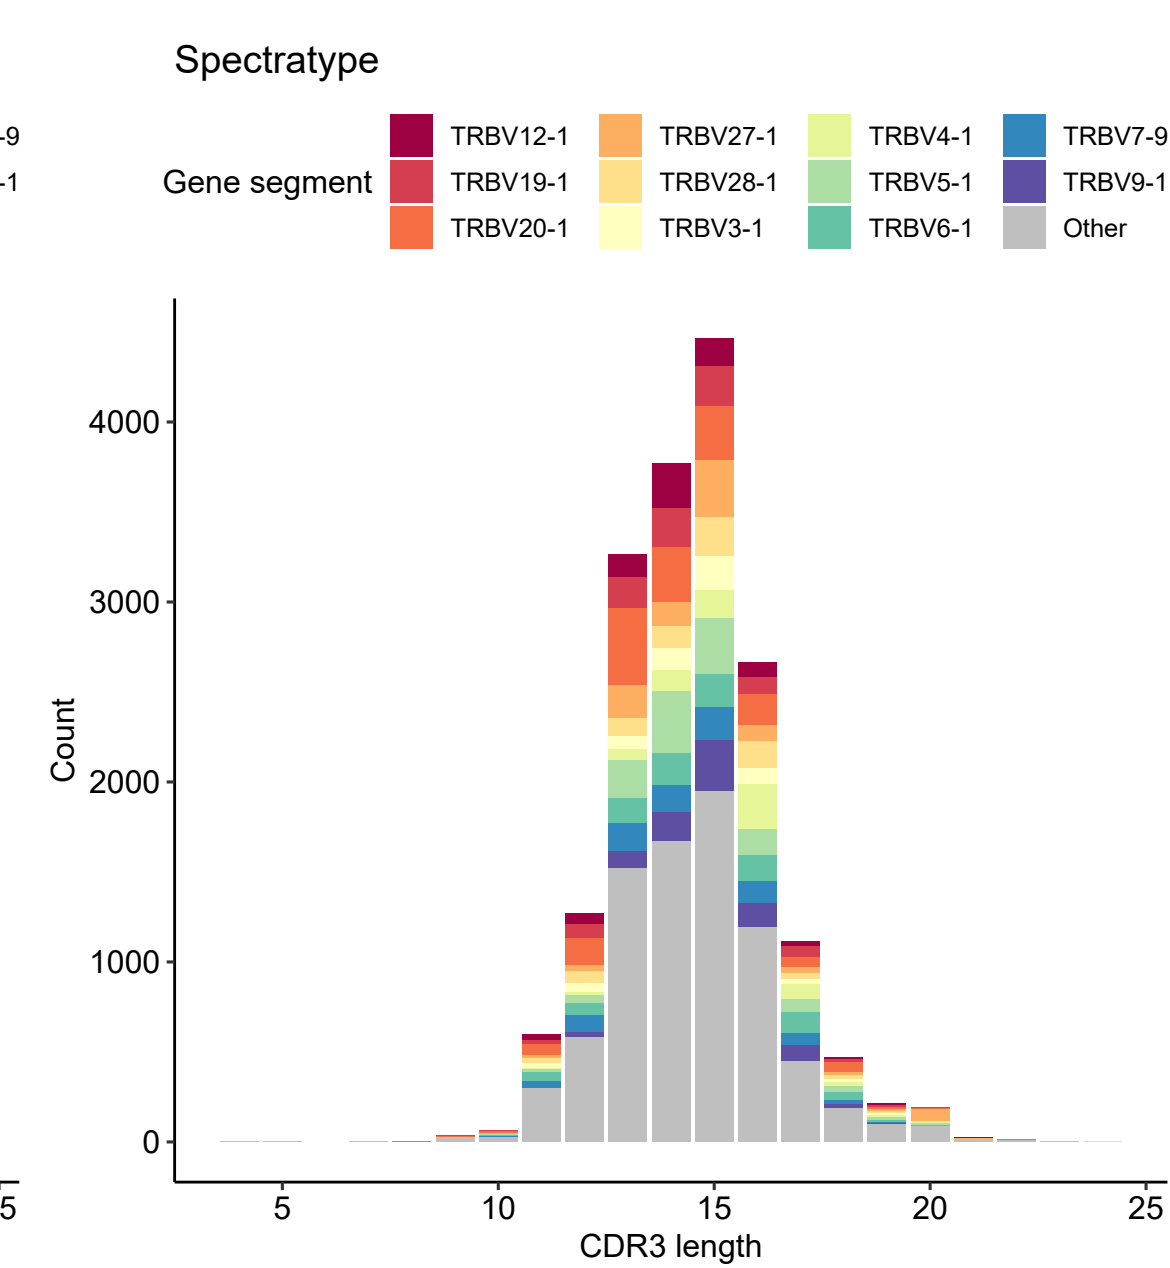

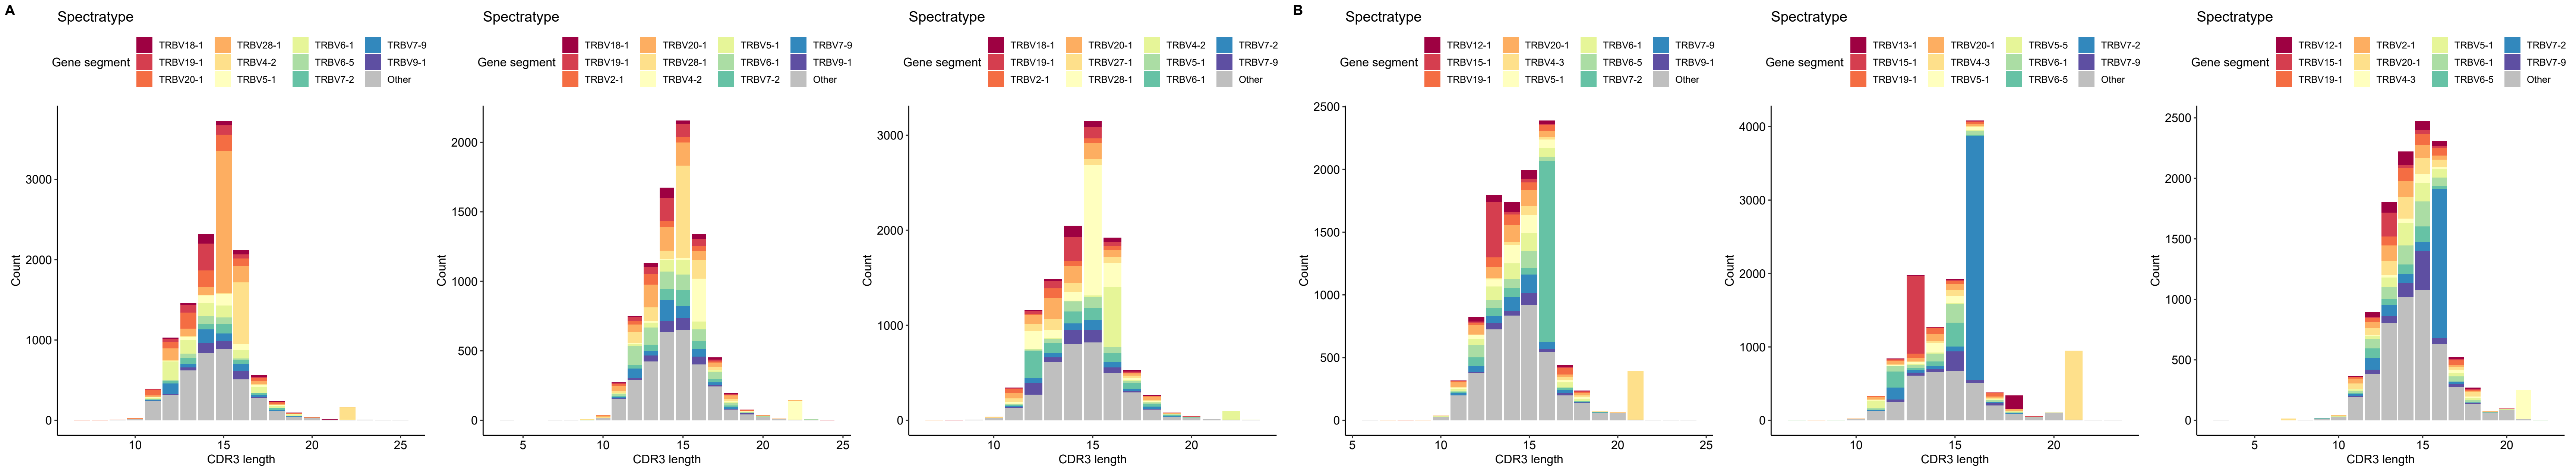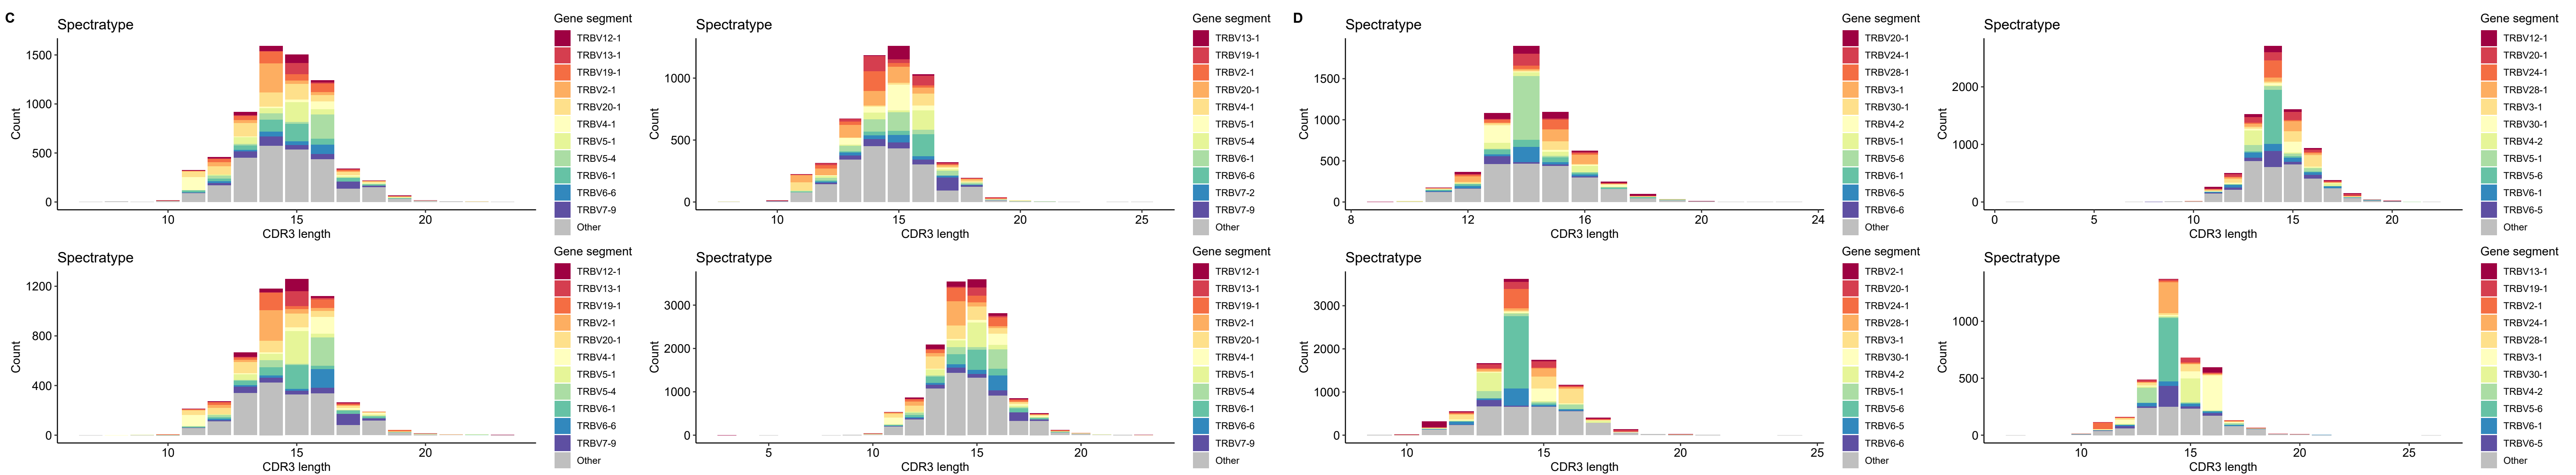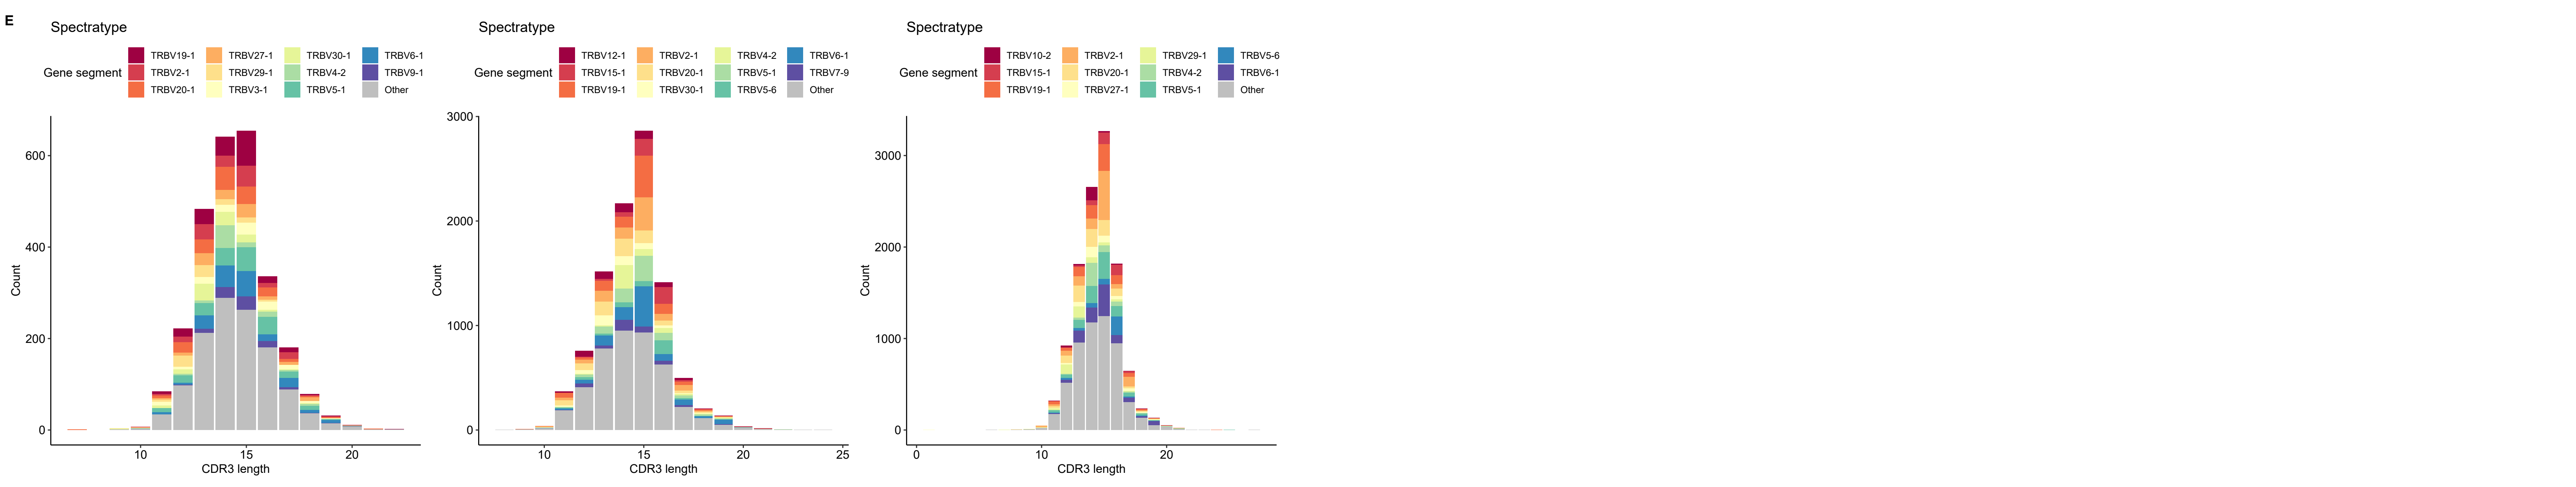

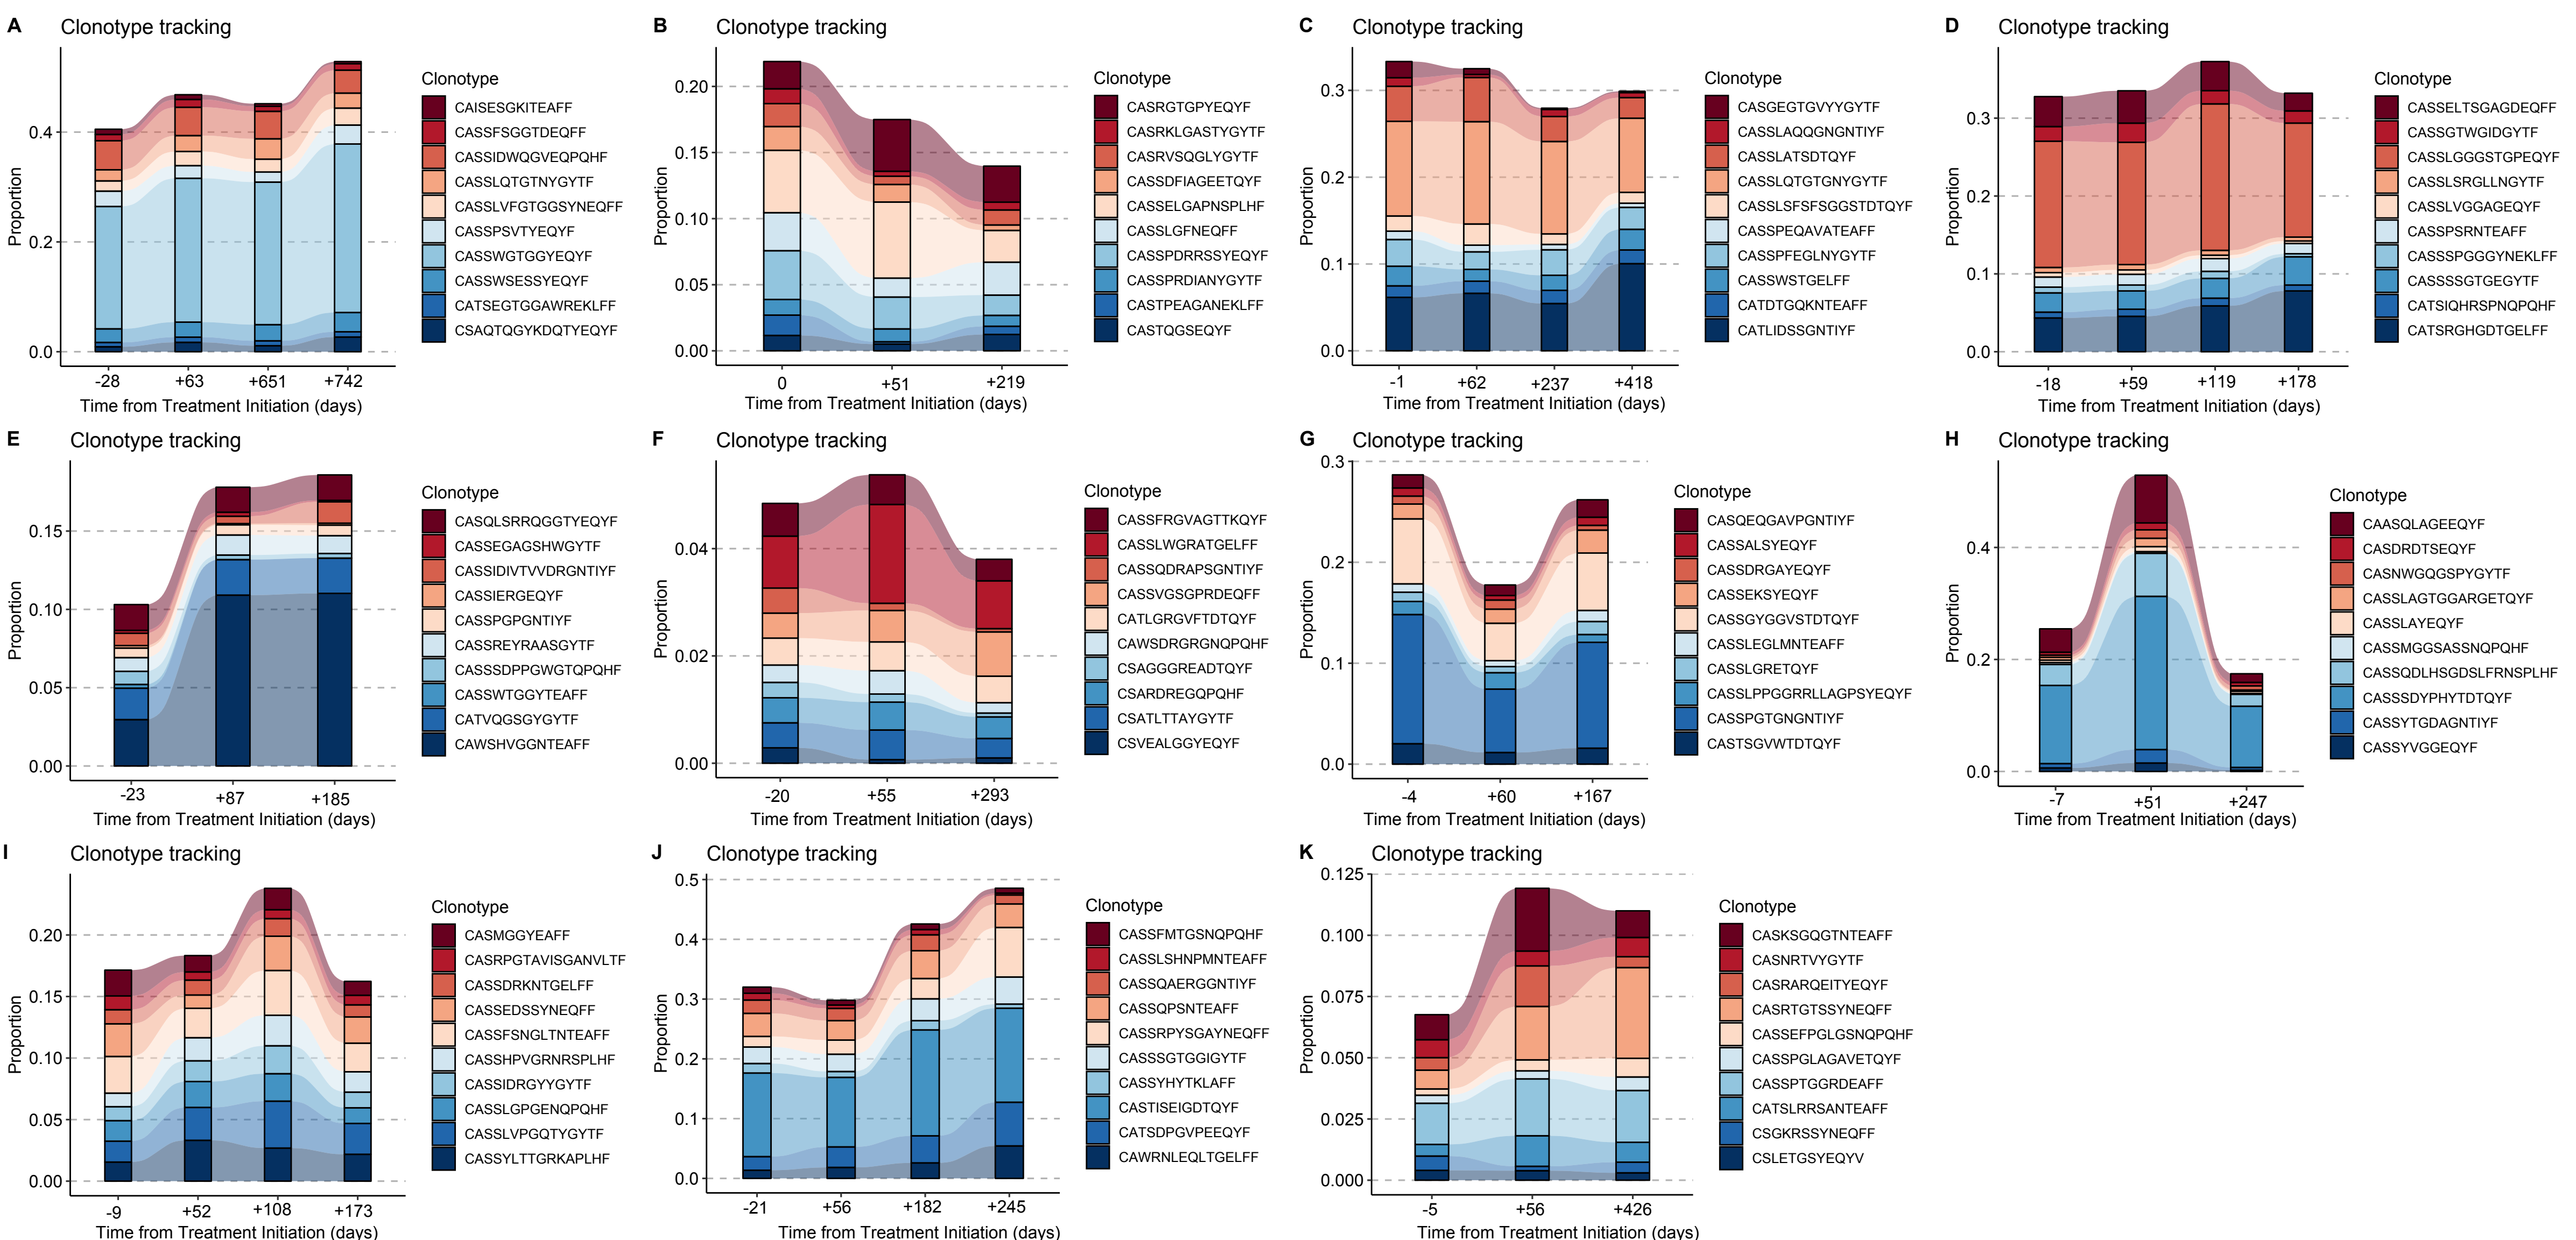



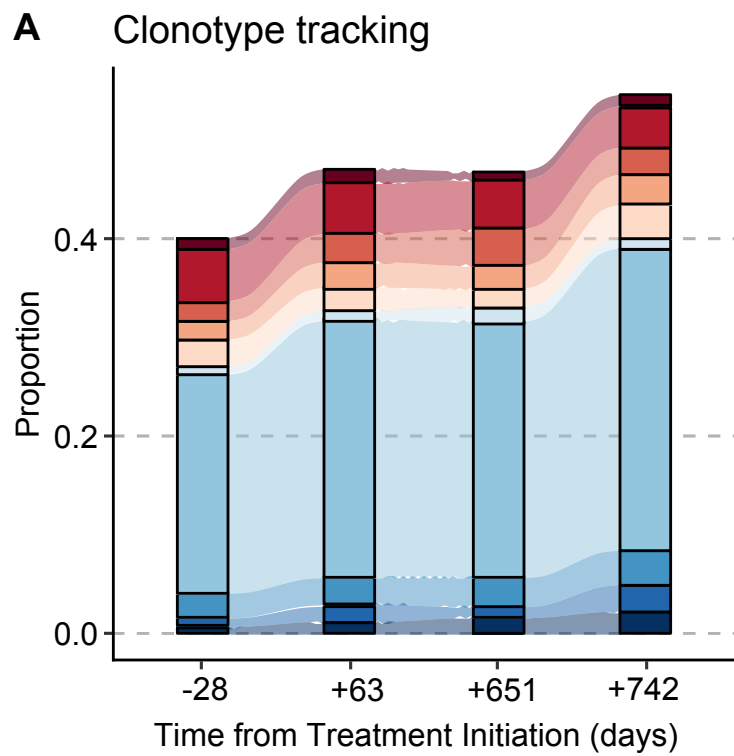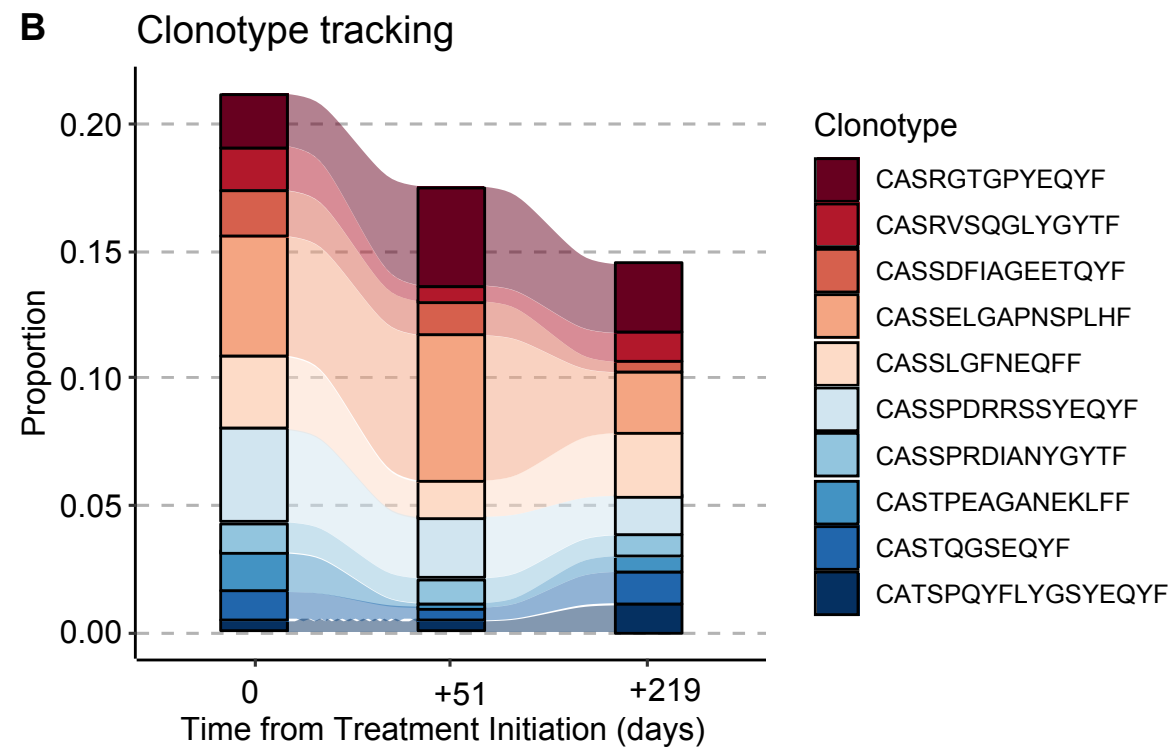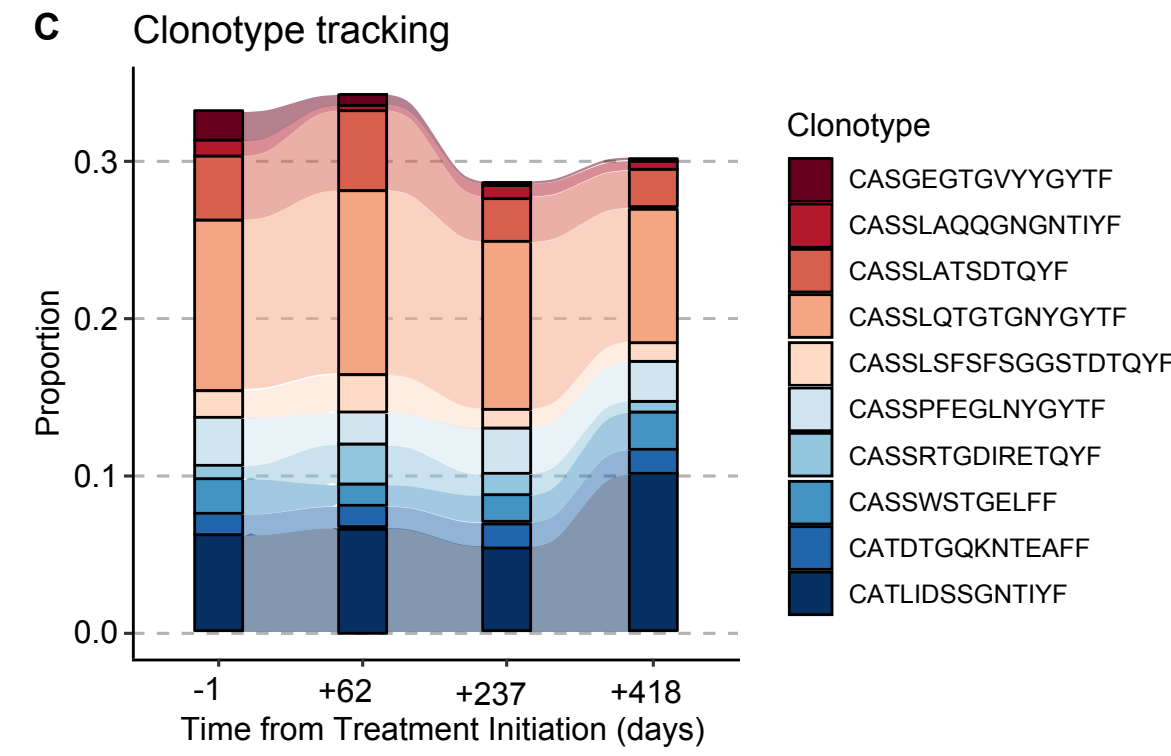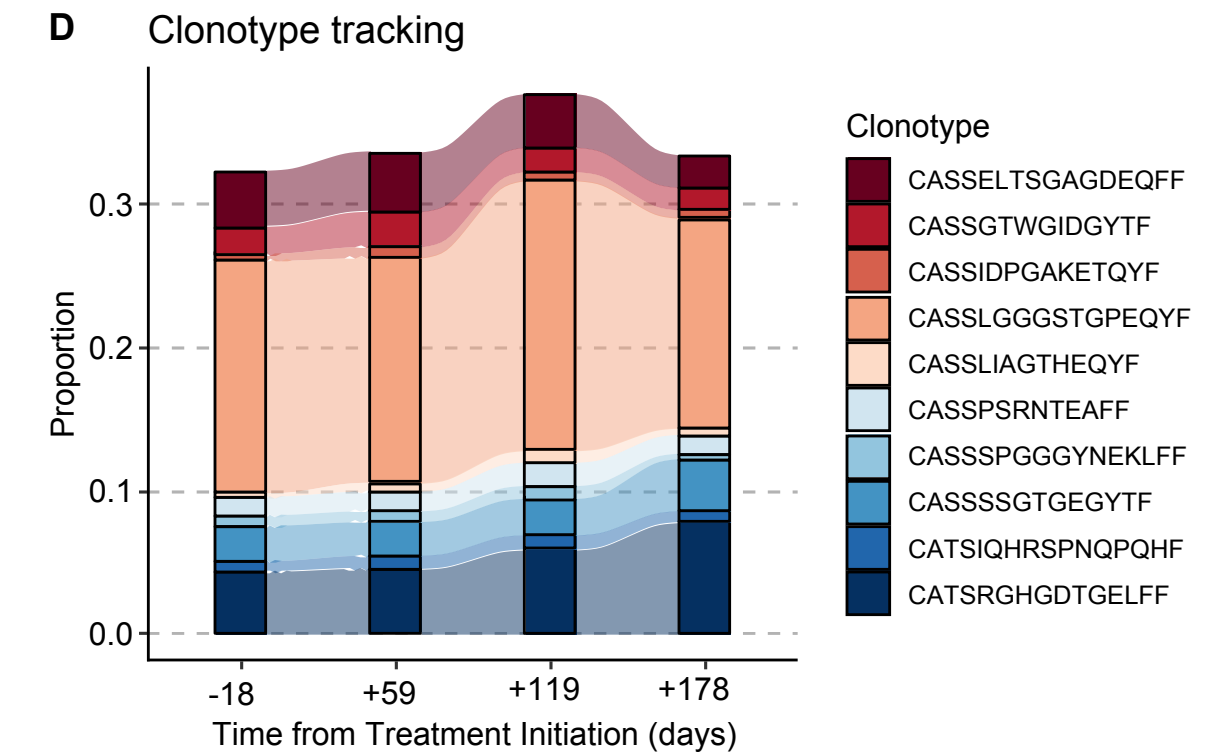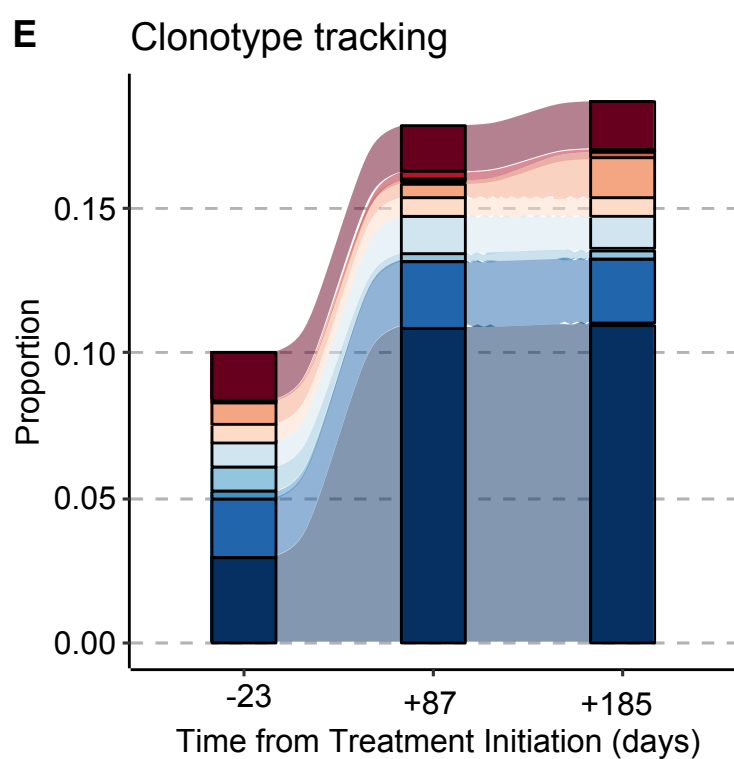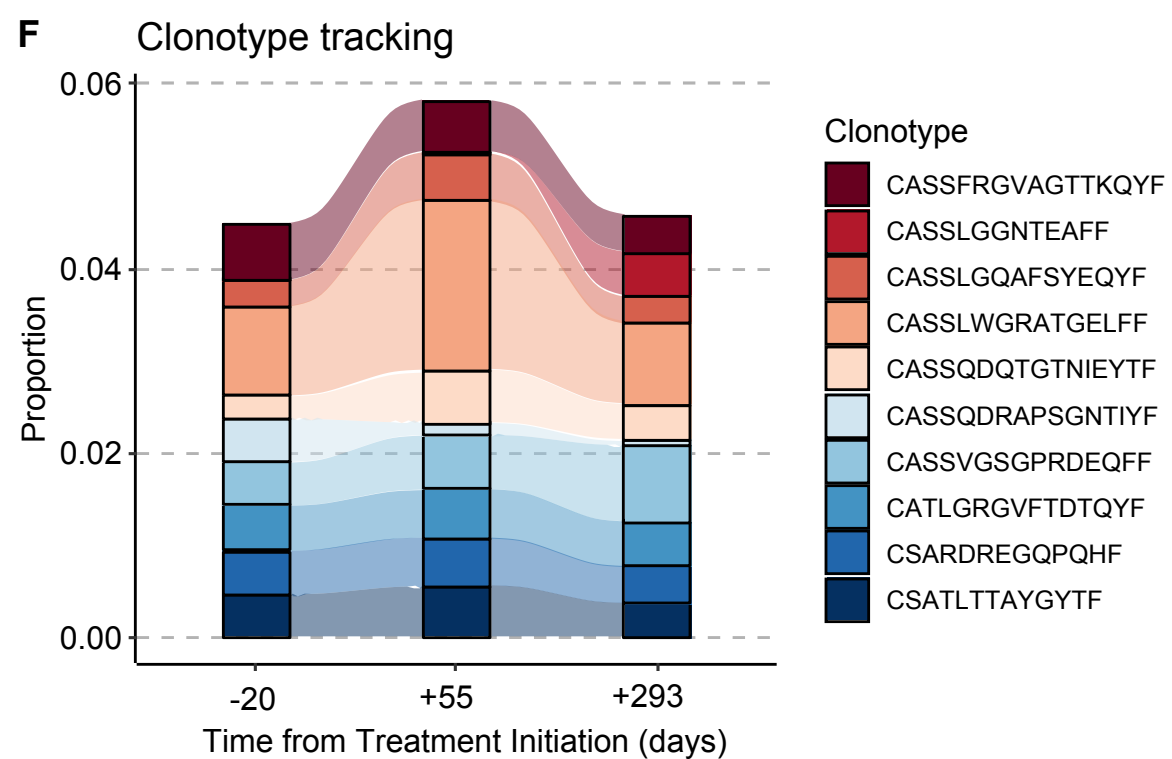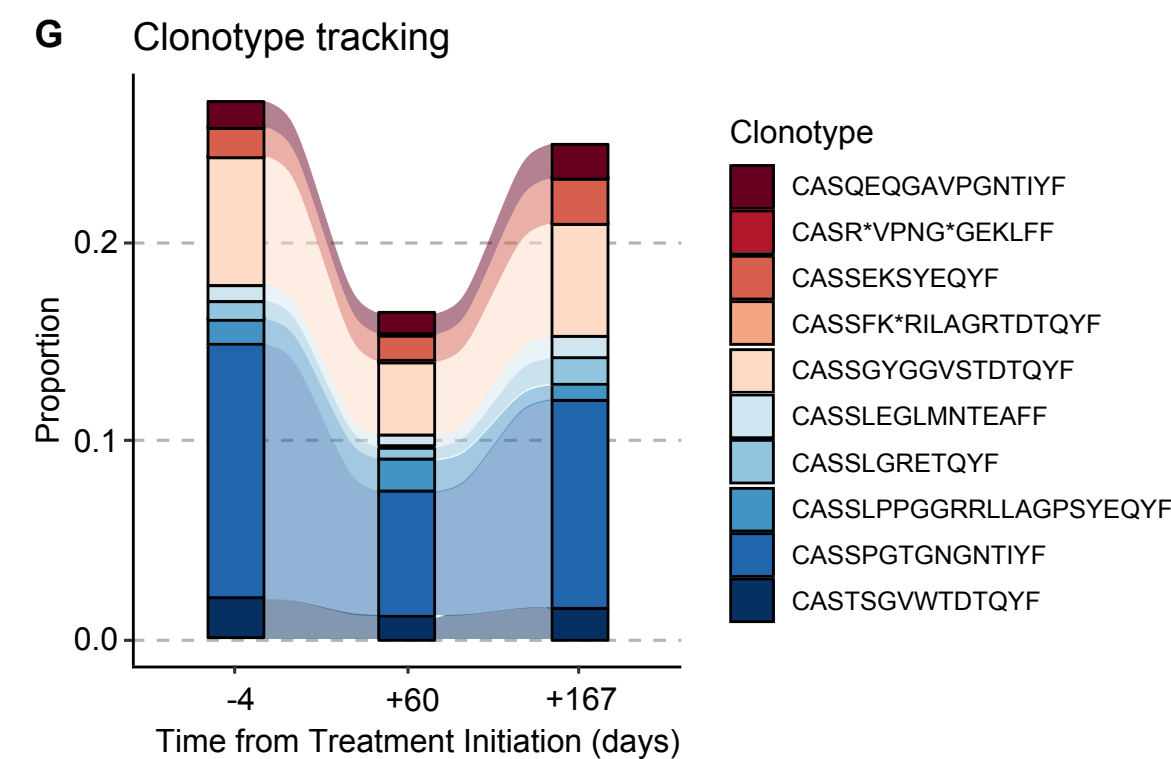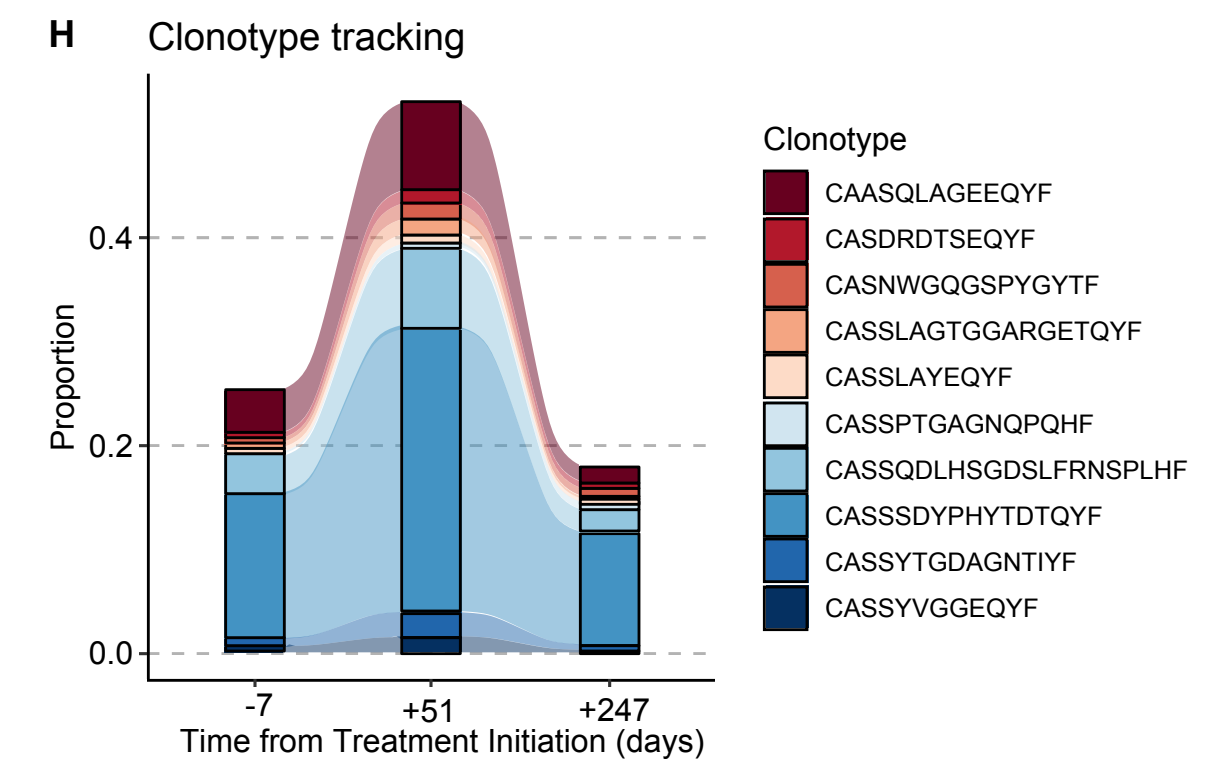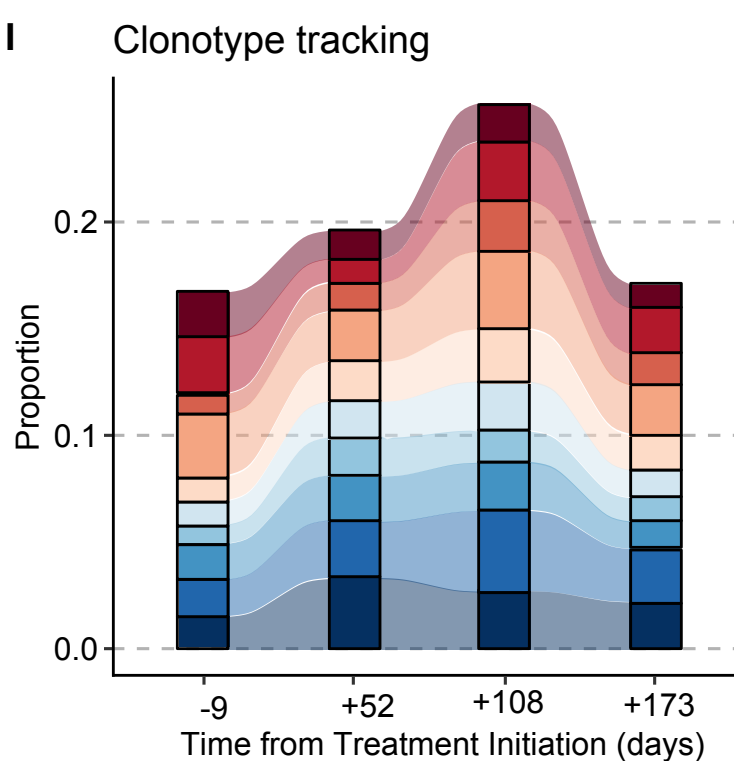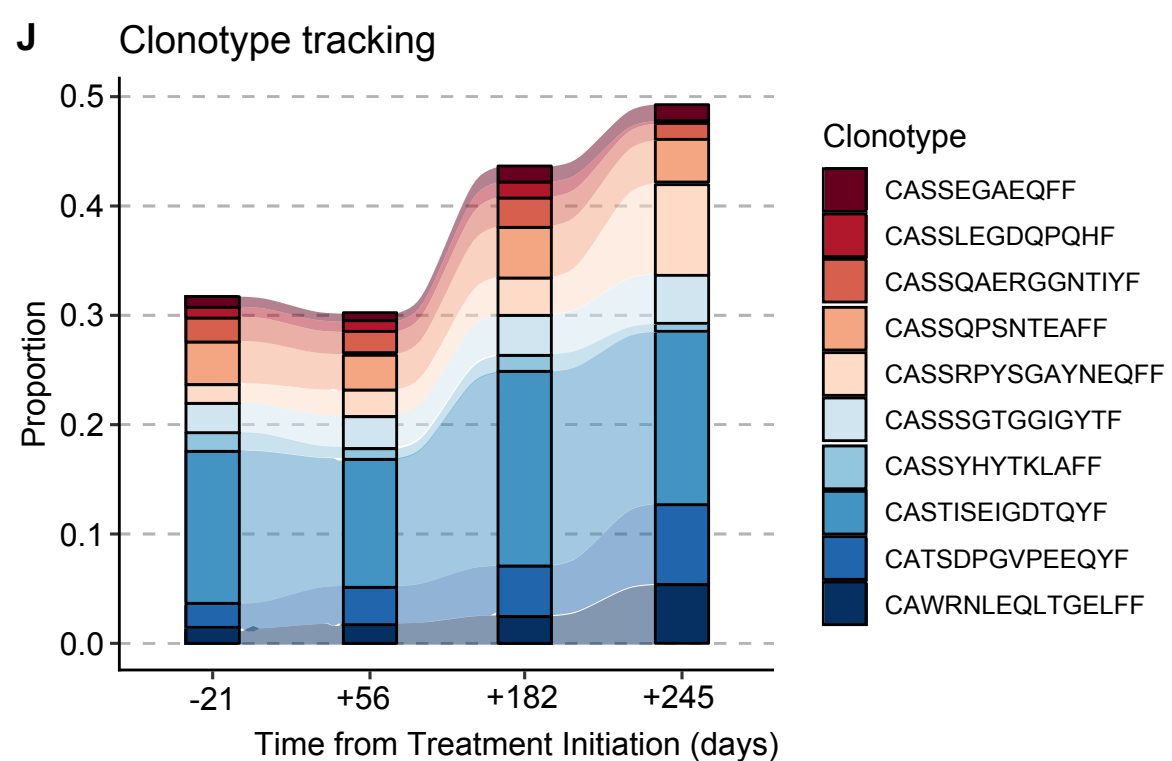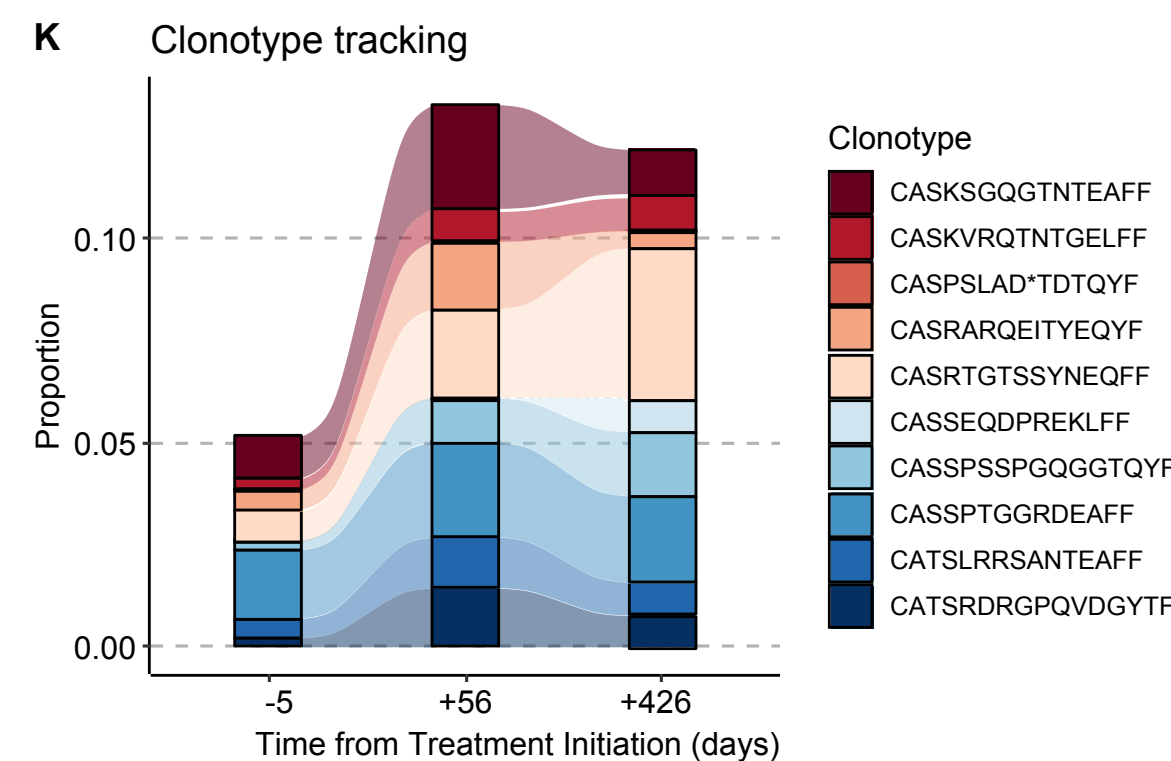

Supplement: DataSheet_1.pdf [file DataSheet_1.pdf]
